# Supplementary material
Source: PubMed Central journal article supplement (PMC7064325)
Supplement: ehp-128-027007-s001.pdf [file ehp-128-027007-s001.pdf]

**Note to readers with disabilities:** *EHP* strives to ensure that all journal content is accessible to all readers. However, some figures and Supplemental Material published in *EHP* articles may not conform to [508 standards](#) due to the complexity of the information being presented. If you need assistance accessing journal content, please contact [ehp508@niehs.nih.gov](mailto:ehp508@niehs.nih.gov). Our staff will work with you to assess and meet your accessibility needs within 3 working days.

### **Supplemental Material**

#### **Serum Levels of Perfluoroalkyl Substances (PFAS) in Adolescents and Young Adults Exposed to Contaminated Drinking Water in the Veneto Region, Italy: A Cross-Sectional Study Based on a Health Surveillance Program**

Gisella Pitter, Filippo Da Re, Cristina Canova, Giulia Barbieri, Maryam Zare Jeddi, Francesca Daprà, Flavio Manea, Rinaldo Zolin, Anna Maria Bettega, Giampaolo Stopazzolo, Silvia Vittorii, Lorena Zambelli, Marco Martuzzi, Domenico Mantoan, and Francesca Russo

#### **Table of Contents**

**Table S1.** Bivariate analyses (Kruskal-Wallis test) on the association between potential predictors and serum concentrations of PFOA, PFOS, and PFHxS in the entire study population (n=18,122 subjects with complete records for all variables).

**Table S2.** Multivariable linear regression models for the association between potential predictors and serum concentrations of PFOA, PFOS, and PFHxS in the study population stratified by predominant residential area (Red Area A: n=11,102 subjects; Red Area B: n=7,020 subjects).

**Table S3.** Multivariable linear regression models for the association between potential predictors and serum concentrations of PFOA, PFOS, and PFHxS in the subset of study population recruited after August 2018 (n=3,605 subjects with complete records for all variables).

**Table S4.** Multivariable linear regression models for the association between potential predictors and serum concentrations of PFOA, PFOS, and PFHxS in the subset of study population recruited after August 2018 (n=3,605 subjects) stratified by predominant residential area (Red Area A: n=1,495 subjects; Red Area B: n=2,110 subjects).

**Figure S1.** Concentrations of PFOA in drinking water from waterworks of the Red Area, by time period.

**Figure S2.** Concentrations of PFOS in drinking water from waterworks of the Red Area, by time period.

**Figure S3.** Concentrations of PFBA in drinking water from waterworks of the Red Area, by time period.

**Figure S4.** Concentrations of PFBS in drinking water from waterworks of the Red Area, by time period.

**Figure S5.** Sum of the concentrations of other PFAS in drinking water from waterworks of the Red Area, by time period.

**Table S1. Bivariate analyses (Kruskal-Wallis test) on the association between potential predictors and serum concentrations of PFOA, PFOS, and PFHxS in the entire study population (n=18,122 subjects with complete records for all variables).**

| Variable                            | n (%)         | PFOA (ng/ml)                                          |         | PFOS (ng/ml)                                          |         | PFHxS (ng/ml)                                         |         |
|-------------------------------------|---------------|-------------------------------------------------------|---------|-------------------------------------------------------|---------|-------------------------------------------------------|---------|
|                                     |               | Median (5 <sup>th</sup> -95 <sup>th</sup> percentile) | p-value | Median (5 <sup>th</sup> -95 <sup>th</sup> percentile) | p-value | Median (5 <sup>th</sup> -95 <sup>th</sup> percentile) | p-value |
| <b>Gender</b>                       |               |                                                       | 0.0001  |                                                       | 0.0001  |                                                       | 0.0001  |
| Female                              | 8,892 (49.1)  | 30.2 (3.8-125.2)                                      |         | 3.2 (1.2-8.3)                                         |         | 2.6 (0.6-9.4)                                         |         |
| Male                                | 9,230 (50.9)  | 64.1 (9.0-240.3)                                      |         | 4.7 (1.8-12.4)                                        |         | 6.1 (1.2-23.3)                                        |         |
| <b>Age (years)</b>                  |               |                                                       | 0.0001  |                                                       | 0.0001  |                                                       | 0.0001  |
| 14-19                               | 4,478 (24.7)  | 52.0 (9.7-153.7)                                      |         | 3.8 (1.5-10.6)                                        |         | 3.6 (0.9-10.2)                                        |         |
| 20-24                               | 3,194 (17.6)  | 52.5 (7.8-192.7)                                      |         | 4.0 (1.5-10.3)                                        |         | 4.2 (0.8-14.4)                                        |         |
| 25-29                               | 3,044 (16.8)  | 50.9 (5.1-208.3)                                      |         | 4.1 (1.5-10.5)                                        |         | 4.8 (0.7-19.0)                                        |         |
| 30-34                               | 3,304 (18.2)  | 35.9 (3.9-205.3)                                      |         | 3.8 (1.3-10.8)                                        |         | 3.9 (0.6-21.8)                                        |         |
| 35-39                               | 4,102 (22.6)  | 28.8 (3.5-203.0)                                      |         | 3.7 (1.3-11.1)                                        |         | 3.3 (0.6-23.9)                                        |         |
| <b>Country of birth</b>             |               |                                                       | 0.0001  |                                                       | 0.0001  |                                                       | 0.0001  |
| Italy, HDC                          | 16,696 (92.1) | 47.0 (5.4-196.0)                                      |         | 3.9 (1.5-10.6)                                        |         | 4.0 (0.7-18.4)                                        |         |
| HMPC                                | 1,426 (7.9)   | 22.9 (3.0-114.3)                                      |         | 3.1 (1.0-11.4)                                        |         | 2.3 (0.5-11.0)                                        |         |
| <b>Educational level</b>            |               |                                                       | 0.0001  |                                                       | 0.0002  |                                                       | 0.0001  |
| Primary/Middle school               | 5,853 (32.3)  | 46.3 (6.5-167.3)                                      |         | 3.8 (1.4-10.9)                                        |         | 3.6 (0.8-13.8)                                        |         |
| High school                         | 9,012 (49.7)  | 43.8 (5.0-203.3)                                      |         | 3.9 (1.4-10.7)                                        |         | 4.0 (0.7-19.8)                                        |         |
| University                          | 3,257 (18.0)  | 42.1 (4.2-197.0)                                      |         | 4.0 (1.4-10.3)                                        |         | 4.0 (0.6-18.8)                                        |         |
| <b>Occupational sector</b>          |               |                                                       | 0.0005  |                                                       | 0.0001  |                                                       | 0.0001  |
| Non-farmer                          | 17,903 (98.8) | 44.3 (5.1-187.3)                                      |         | 3.8 (1.4-10.5)                                        |         | 3.8 (0.7-17.8)                                        |         |
| Farmer                              | 219 (1.2)     | 54.6 (6.7-300.0)                                      |         | 5.3 (1.6-16.4)                                        |         | 6.1 (1.2-36.6)                                        |         |
| <b>Predominant residential area</b> |               |                                                       | 0.0001  |                                                       | 0.0001  |                                                       | 0.0001  |
| Red area A                          | 11,102 (61.3) | 54.9 (7.7-212.3)                                      |         | 4.3 (1.6-11.8)                                        |         | 4.7 (0.9-20.5)                                        |         |
| Red Area B                          | 7,020 (38.7)  | 28.9 (3.6-145.3)                                      |         | 3.3 (1.3-8.5)                                         |         | 2.7 (0.6-13.0)                                        |         |

|                                                            |              |                   |        |                |        |                |        |
|------------------------------------------------------------|--------------|-------------------|--------|----------------|--------|----------------|--------|
| <b>Current municipality of residency (Red Area A or B)</b> |              |                   | 0.0001 |                | 0.0001 |                | 0.0001 |
| Terrazzo (B)                                               | 288 (1.6)    | 10.9 (1.8-66.9)   |        | 2.9 (1.1-7.1)  |        | 1.2 (0.4-5.2)  |        |
| Albaredo D'Adige (B)                                       | 767 (4.2)    | 29.0 (3.6-141.7)  |        | 3.2 (1.3-7.8)  |        | 3.0 (0.6-12.8) |        |
| Arcole (B)                                                 | 899 (5.0)    | 29.5 (4.1-154.0)  |        | 3.4 (1.3-9.5)  |        | 2.8 (0.6-13.6) |        |
| Bevilacqua (B)                                             | 216 (1.2)    | 56.2 (7.1-209.3)  |        | 4.2 (1.6-10.6) |        | 5.6 (0.9-20.2) |        |
| Bonavigo (B)                                               | 279 (1.5)    | 29.8 (3.4-196.7)  |        | 3.2 (1.2-9.4)  |        | 3.0 (0.5-20.8) |        |
| Boschi Sant'Anna (B)                                       | 206 (1.1)    | 38.4 (5.0-173.3)  |        | 3.5 (1.4-9.8)  |        | 3.7 (0.6-18.8) |        |
| Legnago (B)                                                | 2,945 (16.3) | 22.2 (2.9-110.0)  |        | 3.0 (1.2-7.4)  |        | 2.1 (0.5-8.4)  |        |
| Minerbe (B)                                                | 628 (3.5)    | 55.2 (7.9-219.7)  |        | 3.9 (1.6-9.0)  |        | 4.8 (1.1-19.4) |        |
| Veronella (B)                                              | 778 (4.3)    | 48.2 (5.8-174.7)  |        | 3.7 (1.4-9.6)  |        | 4.3 (0.9-19.2) |        |
| Alonte (A)                                                 | 346 (1.9)    | 62.6 (7.7-246.7)  |        | 4.7 (1.5-11.7) |        | 5.5 (1.0-23.1) |        |
| Asigliano Veneto (A)                                       | 161 (0.9)    | 73.3 (6.2-260.0)  |        | 4.7 (1.8-12.0) |        | 6.8 (1.1-27.6) |        |
| Brendola (A)                                               | 1,007 (5.6)  | 41.0 (6.8-143.0)  |        | 4.0 (1.5-11.3) |        | 2.5 (0.6-10.4) |        |
| Cologna Veneta (A)                                         | 1,208 (6.7)  | 53.9 (6.9-194.3)  |        | 4.0 (1.4-10.9) |        | 5.2 (0.9-23.0) |        |
| Lonigo (A)                                                 | 2,569 (14.2) | 61.8 (7.5-249.3)  |        | 4.6 (1.5-13.8) |        | 5.3 (1.0-21.0) |        |
| Montagnana (A)                                             | 1,146 (6.3)  | 67.6 (9.7-213.7)  |        | 4.5 (1.8-11.1) |        | 5.9 (1.3-23.0) |        |
| Noventa Vicentina (A)                                      | 1,410 (7.8)  | 46.4 (8.2-148.3)  |        | 4.0 (1.7-9.4)  |        | 4.1 (1.1-13.6) |        |
| Pojana Maggiore (A)                                        | 767 (4.2)    | 67.5 (11.6-215.3) |        | 4.6 (1.7-11.6) |        | 6.1 (1.3-20.0) |        |
| Pressana (A)                                               | 365 (2.0)    | 58.8 (8.8-210.3)  |        | 3.9 (1.4-9.6)  |        | 5.5 (1.1-23.8) |        |
| Roveredo Di Gua' (A)                                       | 263 (1.4)    | 55.8 (7.7-221.0)  |        | 3.7 (1.6-9.3)  |        | 5.1 (0.9-20.0) |        |
| Sarego (A)                                                 | 1,124 (6.2)  | 47.5 (5.8-259.0)  |        | 4.7 (1.3-15.2) |        | 3.9 (0.7-23.6) |        |
| Zimella (A)                                                | 750 (4.1)    | 49.9 (8.0-201.7)  |        | 4.0 (1.6-10.7) |        | 4.7 (1.1-20.0) |        |
| <b>Duration of residency in the Red Area (years)</b>       |              |                   | 0.0001 |                | 0.0001 |                | 0.0001 |
| <5                                                         | 1,082 (6.0)  | 15.1 (2.5-75.6)   |        | 2.9 (1.0-8.9)  |        | 1.7 (0.4-7.7)  |        |
| 5-9                                                        | 1,375 (7.6)  | 23.9 (3.0-91.3)   |        | 3.1 (1.2-9.0)  |        | 2.3 (0.5-8.2)  |        |
| 10-14                                                      | 3,962 (21.9) | 49.0 (8.5-151.0)  |        | 3.7 (1.5-10.6) |        | 3.5 (0.9-10.3) |        |
| 15-19                                                      | 3,380 (18.6) | 55.6 (8.2-189.2)  |        | 4.0 (1.6-10.3) |        | 4.4 (0.8-14.0) |        |
| 20-24                                                      | 2,887 (15.9) | 54.8 (5.5-208.3)  |        | 4.2 (1.6-10.5) |        | 5.1 (0.8-18.7) |        |
| 25-29                                                      | 2,663 (14.7) | 47.3 (5.1-224.3)  |        | 4.1 (1.5-11.2) |        | 5.1 (0.8-23.1) |        |

|                                                                                |               |                   |        |                |        |                |        |
|--------------------------------------------------------------------------------|---------------|-------------------|--------|----------------|--------|----------------|--------|
| ≥30                                                                            | 2,773 (15.3)  | 39.7 (4.1-242.0)  |        | 4.1 (1.3-11.7) |        | 4.7 (0.7-27.0) |        |
| <b>Time-lag between the beginning of the study and blood sampling (months)</b> |               |                   | 0.0001 |                | 0.0001 |                | 0.0001 |
| <6                                                                             | 2,221 (12.3)  | 55.5 (12.2-172.0) |        | 4.2 (1.6-12.4) |        | 3.6 (0.9-11.1) |        |
| 6-10                                                                           | 5,152 (28.4)  | 54.4 (7.8-207.0)  |        | 4.2 (1.6-10.8) |        | 4.5 (0.9-18.0) |        |
| 11-15                                                                          | 5,283 (29.2)  | 43.5 (5.3-193.3)  |        | 3.9 (1.5-10.8) |        | 3.9 (0.7-18.6) |        |
| 16-20                                                                          | 4,156 (22.9)  | 29.6 (3.1-178.7)  |        | 3.4 (1.2-9.5)  |        | 3.2 (0.6-19.0) |        |
| ≥21                                                                            | 1,310 (7.2)   | 28.0 (3.3-174.7)  |        | 3.5 (1.2-10.0) |        | 3.3 (0.6-22.6) |        |
| <b>BMI (kg/m<sup>2</sup>)</b>                                                  |               |                   | 0.0001 |                | 0.0001 |                | 0.0001 |
| <18.0                                                                          | 1,437 (7.9)   | 42.4 (5.0-160.7)  |        | 3.7 (1.3-9.8)  |        | 3.0 (0.6-11.2) |        |
| 18.0-24.9                                                                      | 11,388 (62.9) | 45.0 (5.2-187.7)  |        | 3.9 (1.4-10.8) |        | 3.8 (0.7-17.4) |        |
| 25.0-29.9                                                                      | 3,895 (21.5)  | 44.9 (4.9-208.3)  |        | 4.0 (1.4-11.2) |        | 4.5 (0.8-21.6) |        |
| ≥30.0                                                                          | 1,402 (7.7)   | 40.0 (4.6-182.0)  |        | 3.5 (1.2-9.5)  |        | 3.9 (0.7-19.6) |        |
| <b>eGFR (ml/min/1.73 m<sup>2</sup>)</b>                                        |               |                   | 0.0095 |                | 0.0555 |                | 0.0006 |
| ≥90                                                                            | 15,691 (86.6) | 44.9 (5.2-187.0)  |        | 3.8 (1.4-10.7) |        | 3.8 (0.7-17.6) |        |
| <90                                                                            | 2,431 (13.4)  | 40.1 (4.4-206.3)  |        | 3.9 (1.4-10.5) |        | 4.1 (0.7-21.0) |        |
| <b>Number of deliveries</b>                                                    |               |                   | 0.0001 |                | 0.0001 |                | 0.0001 |
| 0                                                                              | 15,490 (85.5) | 51.8 (7.0-203.0)  |        | 4.1 (1.6-11.0) |        | 4.4 (0.8-19.2) |        |
| 1                                                                              | 1,100 (6.1)   | 17.1 (2.6-85.8)   |        | 2.8 (1.1-6.9)  |        | 2.1 (0.4-8.0)  |        |
| 2                                                                              | 1,213 (6.7)   | 12.5 (1.9-57.2)   |        | 2.5 (1.0-6.9)  |        | 1.6 (0.4-5.8)  |        |
| ≥3                                                                             | 319 (1.7)     | 9.7 (1.4-44.6)    |        | 2.5 (1.0-7.3)  |        | 1.5 (0.5-4.8)  |        |
| <b>Current pregnancy</b>                                                       |               |                   | 0.0001 |                | 0.0001 |                | 0.0001 |
| No                                                                             | 8,976 (97.3)  | 44.9 (5.1-191.3)  |        | 3.9 (1.4-10.7) |        | 3.9 (0.7-18.2) |        |
| Yes                                                                            | 254 (2.8)     | 21.0 (2.7-84.9)   |        | 3.0 (1.1-7.2)  |        | 0.6 (2.4-8.6)  |        |
| <b>Physical activity</b>                                                       |               |                   | 0.0001 |                | 0.0001 |                | 0.0001 |
| Light                                                                          | 12,607 (69.6) | 43.6 (4.9-191.0)  |        | 3.8 (1.4-10.6) |        | 3.7 (0.7-17.9) |        |
| Moderate                                                                       | 2,364 (13.0)  | 41.9 (4.6-187.3)  |        | 3.8 (1.4-10.2) |        | 3.9 (0.7-18.9) |        |
| Heavy                                                                          | 3,151 (17.4)  | 49.1 (6.1-188.7)  |        | 4.1 (1.6-11.0) |        | 4.3 (0.8-18.2) |        |
| <b>Smoking habits</b>                                                          |               |                   | 0.0001 |                | 0.0123 |                | 0.0001 |
| Never                                                                          | 11,364 (62.7) | 43.5 (4.8-182.7)  |        | 3.8 (1.4-10.7) |        | 3.6 (0.7-16.6) |        |

|                                      |               |                   |        |                |        |                |        |
|--------------------------------------|---------------|-------------------|--------|----------------|--------|----------------|--------|
| Current                              | 4,775 (26.4)  | 49.8 (6.4-209.3)  |        | 3.9 (1.5-10.6) |        | 4.4 (0.8-20.1) |        |
| Former                               | 1,983 (10.9)  | 35.4 (4.0-189.0)  |        | 3.8 (1.4-10.2) |        | 3.8 (0.7-20.6) |        |
| <b>Alcohol intake (AU per week)</b>  |               |                   | 0.0001 |                | 0.0001 |                | 0.0001 |
| Never                                | 5,525 (30.5)  | 36.9 (4.4-151.7)  |        | 3.4 (1.2-9.9)  |        | 3.2 (0.6-12.6) |        |
| 1-2                                  | 7,438 (41.1)  | 42.8 (5.0-178.3)  |        | 3.8 (1.5-10.2) |        | 3.6 (0.7-16.2) |        |
| 3-6                                  | 3,232 (17.8)  | 55.8 (6.4-222.3)  |        | 4.3 (1.7-11.1) |        | 5.3 (0.9-21.6) |        |
| ≥7                                   | 1,927 (10.6)  | 59.9 (7.0-272.7)  |        | 4.8 (1.8-13.4) |        | 6.2 (1.0-25.2) |        |
| <b>Water intake (liters per day)</b> |               |                   | 0.0001 |                | 0.2118 |                | 0.0001 |
| <1.0                                 | 1,739 (9.6)   | 39.8 (5.3-160.7)  |        | 3.8 (1.4-11.2) |        | 3.2 (0.6-13.9) |        |
| 1.0-1.5)                             | 5,037 (27.8)  | 41.3 (4.8-179.0)  |        | 3.8 (1.4-10.9) |        | 3.5 (0.7-16.8) |        |
| 1.5-2.0)                             | 9,463 (52.2)  | 46.1 (5.2-198.0)  |        | 3.9 (1.4-10.4) |        | 4.0 (0.7-18.6) |        |
| ≥2.0                                 | 1,883 (10.4)  | 49.7 (5.5-209.7)  |        | 4.0 (1.4-10.7) |        | 4.8 (0.8-20.7) |        |
| <b>Milk/Yogurt intake</b>            |               |                   | 0.0048 |                | 0.1392 |                | 0.0001 |
| I quartile                           | 5,292 (29.2)  | 46.5 (5.3-193.7)  |        | 3.9 (1.5-10.5) |        | 4.0 (0.7-18.8) |        |
| II quartile                          | 3,985 (22.0)  | 43.7 (5.1-187.0)  |        | 3.8 (1.4-10.9) |        | 3.7 (0.7-17.6) |        |
| III quartile                         | 7,176 (39.6)  | 43.2 (5.0-187.3)  |        | 3.9 (1.4-10.4) |        | 3.8 (0.7-17.9) |        |
| IV quartile                          | 1,669 (9.2)   | 44.8 (4.8-201.0)  |        | 3.8 (1.3-11.0) |        | 3.8 (0.7-17.6) |        |
| <b>Cheese intake</b>                 |               |                   | 0.0607 |                | 0.0001 |                | 0.0001 |
| I quartile                           | 5,433 (30.0)  | 44.3 (5.3- 187.7) |        | 3.8 (1.4-10.9) |        | 3.8 (0.7-18.2) |        |
| II quartile                          | 4,574 (25.2)  | 44.0 (5.1-194.3)  |        | 3.9 (1.4-11.0) |        | 3.8 (0.7-18.2) |        |
| III quartile                         | 4,610 (25.4)  | 46.2 (5.2-188.7)  |        | 4.0 (1.4-10.5) |        | 4.1 (0.7-18.7) |        |
| IV quartile                          | 3,505 (19.4)  | 43.2 (4.5-184.0)  |        | 3.8 (1.4-9.9)  |        | 3.7 (0.6-16.9) |        |
| <b>Meat intake</b>                   |               |                   | 0.0001 |                | 0.0001 |                | 0.0001 |
| I quartile                           | 6,867 (37.9)  | 40.2 (4.6-185.0)  |        | 3.6 (1.3-10.3) |        | 3.6 (0.7-18.1) |        |
| II quartile                          | 3,051 (16.8)  | 43.3 (4.8-187.3)  |        | 3.9 (1.5-10.2) |        | 3.8 (0.7-17.6) |        |
| III quartile                         | 6,813 (37.6)  | 47.7 (5.6-196.3)  |        | 4.0 (1.5-11.1) |        | 4.1 (0.7-18.5) |        |
| IV quartile                          | 1,391 (7.7)   | 52.3 (7.5-196.3)  |        | 4.1 (1.5-11.4) |        | 4.1 (0.8-17.2) |        |
| <b>Fish intake</b>                   |               |                   | 0.0241 |                | 0.0001 |                | 0.3954 |
| I tertile                            | 10,998 (60.7) | 45.0 (5.2-196.7)  |        | 3.8 (1.4-10.4) |        | 3.8 (0.7-18.3) |        |
| II tertile                           | 4,725 (26.1)  | 42.4 (4.8-185.0)  |        | 4.0 (1.5-10.9) |        | 3.8 (0.7-18.2) |        |

|                                                 |               |                  |        |                |        |                |        |
|-------------------------------------------------|---------------|------------------|--------|----------------|--------|----------------|--------|
| III tertile                                     | 2,399 (13.2)  | 45.5 (5.2-172.0) |        | 4.0 (1.6-11.0) |        | 4.0 (0.7-17.2) |        |
| <b>Eggs intake</b>                              |               |                  | 0.0001 |                | 0.0001 |                | 0.0001 |
| I quartile                                      | 5,211 (28.8)  | 43.7 (5.0-186.7) |        | 3.6 (1.3-9.7)  |        | 3.8 (0.7-18.0) |        |
| II quartile                                     | 7,701 (42.5)  | 42.7 (5.0-191.0) |        | 3.9 (1.4-10.4) |        | 3.7 (0.7-17.9) |        |
| III quartile                                    | 3,545 (19.5)  | 47.0 (5.3-196.7) |        | 4.1 (1.5-11.6) |        | 4.0 (0.7-17.9) |        |
| IV quartile                                     | 1,665 (9.2)   | 49.2 (5.1-184.3) |        | 4.4 (1.6-13.3) |        | 4.4 (0.8-19.9) |        |
| <b>Sweets/snacks/ sweet beverages intake</b>    |               |                  | 0.0001 |                | 0.0001 |                | 0.0001 |
| I quartile                                      | 6,340 (35.0)  | 47.0 (5.9-205.7) |        | 4.1 (1.5-11.1) |        | 4.2 (0.8-19.6) |        |
| II quartile                                     | 4,936 (27.2)  | 39.7 (4.3-182.3) |        | 3.7 (1.3-10.0) |        | 3.6 (0.6-17.2) |        |
| III quartile                                    | 4,555 (25.2)  | 46.4 (5.5-191.0) |        | 3.9 (1.4-11.0) |        | 3.9 (0.7-18.1) |        |
| IV quartile                                     | 2,291 (12.6)  | 43.6 (4.9-162.7) |        | 3.6 (1.4-9.9)  |        | 3.5 (0.7-15.4) |        |
| <b>Bread/pasta/cereals intake</b>               |               |                  | 0.0001 |                | 0.0001 |                | 0.0001 |
| I tertile                                       | 7,497 (41.4)  | 38.5 (4.4-180.7) |        | 3.7 (1.4-10.1) |        | 3.5 (0.6-17.6) |        |
| II tertile                                      | 7,880 (43.5)  | 48.8 (6.0-203.0) |        | 4.1 (1.5-11.3) |        | 4.2 (0.8-18.9) |        |
| III tertile                                     | 2,745 (15.1)  | 47.2 (5.6-179.7) |        | 3.7 (1.4-10.2) |        | 3.9 (0.8-16.3) |        |
| <b>Fruit/vegetables intake</b>                  |               |                  | 0.0001 |                | 0.0001 |                | 0.4969 |
| I quartile                                      | 5,435 (30.0)  | 46.9 (5.5-185.7) |        | 3.7 (1.4-10.1) |        | 3.8 (0.7-17.5) |        |
| II quartile                                     | 5,738 (31.7)  | 42.2 (4.7-194.0) |        | 3.9 (1.4-10.8) |        | 3.8 (0.7-18.5) |        |
| III quartile                                    | 3,776 (20.8)  | 43.3 (5.1-194.7) |        | 3.9 (1.4-11.0) |        | 3.8 (0.7-18.0) |        |
| IV quartile                                     | 3,173 (17.5)  | 45.4 (5.3-191.3) |        | 4.0 (1.5-10.9) |        | 3.9 (0.8-18.4) |        |
| <b>Growing one's own vegetables</b>             |               |                  | 0.0001 |                | 0.0001 |                | 0.0001 |
| No                                              | 8,891 (49.1)  | 41.9 (5.0-167.0) |        | 3.5 (1.3-9.1)  |        | 3.6 (0.7-15.2) |        |
| Yes                                             | 9,231 (50.9)  | 47.4 (5.1-212.3) |        | 4.3 (1.5-11.9) |        | 4.2 (0.7-20.3) |        |
| <b>Raising animals for personal consumption</b> |               |                  | 0.2725 |                | 0.0001 |                | 0.0001 |
| No                                              | 14,334 (79.1) | 44.4 (5.2-181.3) |        | 3.7 (1.4-9.6)  |        | 3.8 (0.7-17.0) |        |
| Yes                                             | 3,788 (20.9)  | 44.5 (4.6-230.0) |        | 4.7 (1.7-14.1) |        | 4.3 (0.7-22.2) |        |

Abbreviations: AU, Alcohol Units; BMI, Body Mass Index; eGFR, estimated glomerular filtration rate; HDC, Highly Developed Countries; HMPC, High Migratory Pressure Countries; PFOA, perfluorooctanoic acid; PFHxS, perfluorohexanesulfonic acid; PFOS, perfluorooctanesulfonic acid.

Legend

*Red Area: the area of the Veneto Region including municipalities supplied by PFAS contaminated waterworks.*

*Red Area A: part of Red Area whose municipalities are located on the groundwater contamination plume.*

*Red Area B: part of Red Area whose municipalities are located outside the groundwater contamination plume.*

*HDC were defined as not Central-Eastern Europe, North America, Oceania, Israel and Japan. HMPC were defined as Central-Eastern Europe, North Africa, Sub-Saharan Africa, Asia except for Israel and Japan, and Central and South America countries. Duration of residency in the Red Area was calculated as the number of years spent in the Red Area between 1980 and 2013 (when granular activated carbon filters were installed). Intake of food items was categorised based on quartiles or tertiles.*



Table S2. Multivariable linear regression models for the association between potential predictors and serum concentrations of PFOA, PFOS, and PFHxS in the study population stratified by predominant residential area (Red Area A: n=11,102 subjects; Red Area B: n=7,020 subjects).

| Predictor                     |               |              | PFOA                  |                       | PFOS                  |                       | PFHxS                 |                       |
|-------------------------------|---------------|--------------|-----------------------|-----------------------|-----------------------|-----------------------|-----------------------|-----------------------|
|                               | Red Area A    | Red Area B   | Red Area A            | Red Area B            | Red Area A            | Red Area B            | Red Area A            | Red Area B            |
|                               | n (%)         | n (%)        | % difference (95% CI) |
| <b>Gender</b>                 |               |              |                       |                       |                       |                       |                       |                       |
| Female                        | 5,634 (50.7)  | 3,596 (51.2) | Referent              | Referent              | Referent              | Referent              | Referent              | Referent              |
| Male                          | 5,468 (49.3)  | 3,424 (48.8) | 69 (62; 75)           | 64 (56; 73)           | 42 (39; 46)           | 41 (37; 46)           | 97 (91; 103)          | 88 (80; 96)           |
| <i>Explained variance (%)</i> |               |              | 14,96                 | 9,49                  | 10,26                 | 10,74                 | 22,09                 | 16,1                  |
| <b>Age (years)</b>            |               |              |                       |                       |                       |                       |                       |                       |
| 14-19                         | 2,784 (25.1)  | 1,694 (24.1) | Referent              | Referent              | Referent              | Referent              | Referent              | Referent              |
| 20-24                         | 1,991 (17.9)  | 1,203 (17.1) | -8 (-14; -1)          | -14 (-23; -3)         | -3 (-7; 2)            | 0 (-6; 6)             | -1 (-7; 5)            | -3 (-12; 6)           |
| 25-29                         | 1,867 (16.8)  | 1,177 (16.8) | -2 (-10; 7)           | -29 (-38; -17)        | 5 (-1; 11)            | -6 (-13; 2)           | 18 (10; 27)           | -8 (-18; 4)           |
| 30-34                         | 2,016 (18.2)  | 1,288 (18.4) | -11 (-18; -2)         | -35 (-44; -23)        | 11 (5; 18)            | -1 (-10; 7)           | 23 (14; 33)           | -12 (-22; 0)          |
| 35-39                         | 2,444 (22.0)  | 1,658 (23.6) | 0 (-9; 10)            | -21 (-33; -7)         | 24 (17; 32)           | 8 (-1; 18)            | 36 (26; 48)           | 5 (-8; 19)            |
| <i>Explained variance (%)</i> |               |              | 2,38                  | 4,16                  | 0,11                  | 0,56                  | 1,79                  | 0,34                  |
| <b>Country of birth</b>       |               |              |                       |                       |                       |                       |                       |                       |
| Italy, HDC                    | 10,135 (91.3) | 6,561 (93.5) | Referent              | Referent              | Referent              | Referent              | Referent              | Referent              |
| HMPC                          | 967 (8.7)     | 459 (6.5)    | -9 (-14; -3)          | -8 (-17; 2)           | --                    | --                    | --                    | --                    |
| <i>Explained variance (%)</i> |               |              | 1,89                  | 0,66                  | --                    | --                    | --                    | --                    |
| <b>Educational level</b>      |               |              |                       |                       |                       |                       |                       |                       |
| Primary/Middle school         | 3,706 (33.4)  | 2,147 (30.6) | Referent              | Referent              | Referent              | Referent              | Referent              | Referent              |
| High school                   | 5,440 (49.0)  | 3,572 (50.9) | -5 (-9; 0)            | 1 (-6; 9)             | 1 (-2; 4)             | 1 (-3; 5)             | -4 (-8; -1)           | 0 (-6; 6)             |
| University                    | 1,956 (17.6)  | 1,301 (18.5) | -4 (-10; 2)           | 15 (5; 26)            | 4 (0; 9)              | 8 (3; 13)             | -5 (-10; -1)          | 9 (2; 17)             |
| <i>Explained variance (%)</i> |               |              | 0,25                  | 0,52                  | 0,28                  | 0,42                  | 0,24                  | 0,37                  |
| <b>Occupational sector</b>    |               |              |                       |                       |                       |                       |                       |                       |
| Non-farmer                    | 10,959 (98.7) | 6,944 (98.9) | Referent              | Referent              | Referent              | Referent              | Referent              | Referent              |
| Farmer                        | 143 (1.3)     | 76 (1.1)     | --                    | --                    | 12 (2; 22)            | -1 (-12; 11)          | --                    | --                    |

|                                                            |              |              |                |                |             |             |                |                |
|------------------------------------------------------------|--------------|--------------|----------------|----------------|-------------|-------------|----------------|----------------|
| <i>Explained variance (%)</i>                              |              |              | --             | --             | 0,05        | 0           | --             | --             |
| <b>Current municipality of residency (Red Area A or B)</b> |              |              |                |                |             |             |                |                |
| Terrazzo (B)                                               |              | 283 (4.0)    | --             | Referent       | --          | Referent    | --             | Referent       |
| Albaredo D'Adige (B)                                       |              | 746 (10.6)   | --             | 152 (120; 189) | --          | 10 (2; 18)  | --             | 119 (96; 144)  |
| Arcole (B)                                                 |              | 852 (12.1)   | --             | 176 (142; 217) | --          | 20 (12; 29) | --             | 124 (101; 149) |
| Bevilacqua (B)                                             |              | 202 (2.9)    | --             | 358 (285; 445) | --          | 41 (29; 55) | --             | 279 (230; 336) |
| Bonavigo (B)                                               |              | 274 (3.9)    | --             | 172 (132; 220) | --          | 16 (6; 26)  | --             | 140 (111; 172) |
| Boschi Sant'Anna (B)                                       |              | 203 (2.9)    | --             | 210 (160; 269) | --          | 22 (11; 34) | --             | 164 (129; 203) |
| Legnago (B)                                                |              | 2,906 (41.4) | --             | 81 (61; 104)   | --          | 5 (-2; 12)  | --             | 56 (42; 72)    |
| Minerbe (B)                                                |              | 609 (8.7)    | --             | 328 (273; 390) | --          | 31 (22; 41) | --             | 247 (211; 287) |
| Veronella (B)                                              |              | 689 (9.8)    | --             | 335 (279; 400) | --          | 30 (20; 40) | --             | 242 (206; 282) |
| Other (B)                                                  |              | 256 (3.7)    | --             | 238 (186; 300) | --          | 37 (26; 50) | --             | 173 (139; 212) |
| Brendola (A)                                               | 1,005 (9.0)  |              | Referent       | --             | Referent    | --          | Referent       | --             |
| Alonte (A)                                                 | 346 (3.1)    |              | 51 (37; 68)    | --             | 14 (7; 22)  | --          | 106 (90; 125)  | --             |
| Asigliano Veneto (A)                                       | 159 (1.4)    |              | 67 (45; 92)    | --             | 10 (1; 21)  | --          | 128 (102; 156) | --             |
| Cologna Veneta (A)                                         | 1,153 (10.4) |              | 49 (36; 63)    | --             | 13 (6; 20)  | --          | 107 (92; 123)  | --             |
| Lonigo (A)                                                 | 2,553 (23.0) |              | 59 (50; 69)    | --             | 19 (14; 23) | --          | 112 (101; 123) | --             |
| Montagnana (A)                                             | 1,078 (9.7)  |              | 69 (57; 82)    | --             | 17 (11; 23) | --          | 126 (113; 141) | --             |
| Noventa Vicentina (A)                                      | 1,385 (12.5) |              | 21 (12; 29)    | --             | 1 (-4; 6)   | --          | 56 (47; 65)    | --             |
| Pojana Maggiore (A)                                        | 757 (6.8)    |              | 60 (48; 74)    | --             | 9 (4; 15)   | --          | 113 (99; 128)  | --             |
| Pressana (A)                                               | 347 (3.1)    |              | 59 (42; 78)    | --             | 6 (-2; 14)  | --          | 109 (90; 130)  | --             |
| Roveredo Di Gua' (A)                                       | 253 (2.3)    |              | 52 (34; 72)    | --             | 3 (-5; 12)  | --          | 104 (83; 127)  | --             |
| Sarego (A)                                                 | 1,119 (10.1) |              | 33 (24; 43)    | --             | 21 (16; 27) | --          | 68 (58; 78)    | --             |
| Zimella (A)                                                | 705 (6.4)    |              | 45 (31; 60)    | --             | 16 (9; 24)  | --          | 96 (81; 113)   | --             |
| Other (A)                                                  | 242 (2.2)    |              | 39 (22; 58)    | --             | 6 (-3; 16)  | --          | 86 (67; 108)   | --             |
| <i>Explained variance (%)</i>                              |              |              | 2,97           | 10,08          | 2,59        | 2,38        | 6,65           | 12,23          |
| <b>Duration of residency in the Red Area (years)</b>       |              |              |                |                |             |             |                |                |
| <5                                                         | 668 (6.0)    | 414 (5.9)    | Referent       | Referent       | Referent    | Referent    | Referent       | Referent       |
| 5-9                                                        | 865 (7.8)    | 510 (7.2)    | 52 (39; 65)    | 36 (19; 54)    | 10 (4; 16)  | 5 (-2; 13)  | 29 (20; 38)    | 25 (13; 39)    |
| 10-14                                                      | 2,439 (22.0) | 1,523 (21.7) | 110 (93; 128)  | 78 (56; 103)   | 23 (16; 30) | 9 (2; 17)   | 76 (64; 89)    | 57 (41; 74)    |
| 15-19                                                      | 2,104 (19.0) | 1,276 (18.2) | 137 (117; 159) | 96 (71; 125)   | 28 (21; 36) | 11 (3; 19)  | 113 (98; 129)  | 78 (60; 98)    |

|                                                                                |              |              |                |                |                |                |                |                |
|--------------------------------------------------------------------------------|--------------|--------------|----------------|----------------|----------------|----------------|----------------|----------------|
| 20-24                                                                          | 1,731 (15.6) | 1,156 (16.5) | 144 (123; 167) | 93 (68; 121)   | 34 (26; 42)    | 14 (6; 23)     | 134 (117; 152) | 80 (61; 101)   |
| 25-29                                                                          | 1,602 (14.4) | 1,061 (15.1) | 147 (127; 169) | 114 (89; 143)  | 29 (22; 37)    | 16 (8; 24)     | 146 (129; 163) | 100 (82; 121)  |
| ≥30                                                                            | 1,693 (15.2) | 1,080 (15.4) | 143 (123; 164) | 82 (61; 106)   | 25 (19; 33)    | 6 (-1; 13)     | 147 (131; 165) | 75 (59; 93)    |
| <i>Explained variance (%)</i>                                                  |              |              | <i>4,92</i>    | <i>2,44</i>    | <i>1,45</i>    | <i>0,4</i>     | <i>7,81</i>    | <i>3,29</i>    |
| <b>Time-lag between the beginning of the study and blood sampling (months)</b> |              |              |                |                |                |                |                |                |
| < 6                                                                            | 1,990 (17.9) | 231 (3.3)    | Referent       | Referent       | Referent       | Referent       | Referent       | Referent       |
| 6-10                                                                           | 3,825 (34.5) | 1,327 (18.9) | 0 (-7; 6)      | 7 (-7; 23)     | -5 (-9; 0)     | 0 (-8; 7)      | 7 (1; 13)      | 8 (-3; 21)     |
| 11-15                                                                          | 3,234 (29.1) | 2,049 (29.2) | -2 (-9; 6)     | 7 (-8; 25)     | -11 (-15; -6)  | 1 (-7; 10)     | 3 (-3; 10)     | 7 (-5; 21)     |
| 16-20                                                                          | 1,399 (12.6) | 2,757 (39.3) | -16 (-25; -7)  | 1 (-15; 20)    | -23 (-28; -17) | -11 (-19; -2)  | -3 (-11; 6)    | 9 (-5; 26)     |
| ≥21                                                                            | 654 (5.9)    | 656 (9.3)    | -27 (-36; -18) | -8 (-25; 13)   | -31 (-36; -25) | -12 (-21; -2)  | -13 (-21; -4)  | 4 (-11; 22)    |
| <i>Explained variance (%)</i>                                                  |              |              | <i>0,49</i>    | <i>0,13</i>    | <i>0,76</i>    | <i>0,4</i>     | <i>0,3</i>     | <i>0,09</i>    |
| <b>BMI (kg/m<sup>2</sup>)</b>                                                  |              |              |                |                |                |                |                |                |
| <18.0                                                                          | 834 (7.5)    | 603 (8.6)    | --             | --             | 1 (-3; 5)      | -1 (-5; 4)     | -4 (-8; 2)     | -6 (-12; 0)    |
| 18.0-24.9                                                                      | 7,040 (63.4) | 4,348 (61.9) | Referent       | Referent       | Referent       | Referent       | Referent       | Referent       |
| 25.0-29.9                                                                      | 2,391 (21.5) | 1,504 (21.4) | --             | --             | -2 (-5; 0)     | -5 (-8; -2)    | 4 (1; 8)       | 1 (-4; 6)      |
| ≥30.0                                                                          | 837 (7.6)    | 565 (8.1)    | --             | --             | -11 (-15; -8)  | -13 (-17; -8)  | 6 (0; 11)      | 3 (-4; 10)     |
| <i>Explained variance (%)</i>                                                  |              |              | <i>--</i>      | <i>--</i>      | <i>0,42</i>    | <i>0,8</i>     | <i>0,15</i>    | <i>0,03</i>    |
| <b>eGFR (ml/min/1.73 m<sup>2</sup>)</b>                                        |              |              |                |                |                |                |                |                |
| ≥90                                                                            | 9,809 (88.4) | 5,882 (83.8) | Referent       | Referent       | Referent       | Referent       | Referent       | Referent       |
| <90                                                                            | 1,293 (11.6) | 1,138 (16.2) | 8 (3; 13)      | 4 (-3; 10)     | 7 (4; 11)      | 4 (1; 8)       | 7 (2; 11)      | 3 (-2; 8)      |
| <i>Explained variance (%)</i>                                                  |              |              | <i>0,18</i>    | <i>0,04</i>    | <i>0,18</i>    | <i>0,08</i>    | <i>0,18</i>    | <i>0,03</i>    |
| <b>Number of deliveries</b>                                                    |              |              |                |                |                |                |                |                |
| 0                                                                              | 9,493 (85.5) | 5,997 (85.4) | Referent       | Referent       | Referent       | Referent       | Referent       | Referent       |
| 1                                                                              | 665 (6.0)    | 435 (6.2)    | -41 (-46; -37) | -37 (-44; -30) | -18 (-22; -14) | -14 (-19; -9)  | -34 (-38; -29) | -25 (-31; -18) |
| 2                                                                              | 739 (6.7)    | 474 (6.8)    | -58 (-61; -55) | -56 (-60; -51) | -26 (-29; -22) | -24 (-28; -20) | -49 (-52; -45) | -40 (-45; -35) |
| ≥3                                                                             | 205 (1.8)    | 114 (1.6)    | -66 (-70; -62) | -57 (-64; -47) | -26 (-32; -20) | -14 (-22; -4)  | -54 (-58; -49) | -34 (-43; -23) |
| <i>Explained variance (%)</i>                                                  |              |              | <i>4,43</i>    | <i>2,82</i>    | <i>1,26</i>    | <i>1,13</i>    | <i>3,01</i>    | <i>1,53</i>    |
| <b>Smoking habit</b>                                                           |              |              |                |                |                |                |                |                |
| Never                                                                          | 6,929 (62.4) | 4,435 (63.2) | Referent       | Referent       | Referent       | Referent       | Referent       | Referent       |
| Current                                                                        | 3,073 (27.7) | 1,702 (24.2) | 1 (-3; 5)      | 2 (-4; 8)      | -6 (-8; -3)    | -7 (-10; -4)   | 2 (-2; 5)      | 1 (-3; 6)      |
| Former                                                                         | 1,100 (9.9)  | 883 (12.6)   | -9 (-14; -3)   | 0 (-7; 8)      | -8 (-11; -4)   | -1 (-4; 3)     | -6 (-10; -1)   | 3 (-3; 9)      |

|                                      |              |              |               |               |                |               |              |               |
|--------------------------------------|--------------|--------------|---------------|---------------|----------------|---------------|--------------|---------------|
| <i>Explained variance (%)</i>        |              |              | <i>0,14</i>   | <i>0,04</i>   | <i>0,13</i>    | <i>0,2</i>    | <i>0,1</i>   | <i>0,03</i>   |
| <b>Alcohol intake (AU per week)</b>  |              |              |               |               |                |               |              |               |
| Never                                | 3,491 (31.4) | 2,034 (29.0) | Referent      | Referent      | Referent       | Referent      | Referent     | Referent      |
| 1-2                                  | 4,183 (37.7) | 3,255 (46.3) | 1 (-3; 5)     | 3 (-3; 9)     | 4 (1; 7)       | 7 (3; 10)     | -2 (-5; 1)   | 2 (-3; 6)     |
| 3-6                                  | 2,076 (18.7) | 1,156 (16.5) | 9 (3; 15)     | 5 (-3; 14)    | 6 (2; 10)      | 6 (2; 11)     | 3 (-1; 7)    | 2 (-4; 9)     |
| ≥7                                   | 1,352 (12.2) | 575 (8.2)    | 13 (6; 19)    | 10 (0; 21)    | 7 (3; 12)      | 16 (11; 23)   | 7 (2; 13)    | 5 (-3; 14)    |
| <i>Explained variance (%)</i>        |              |              | <i>0,74</i>   | <i>0,22</i>   | <i>0,39</i>    | <i>0,59</i>   | <i>0,46</i>  | <i>0,11</i>   |
| <b>Water intake (liters per day)</b> |              |              |               |               |                |               |              |               |
| <1.0                                 | 1,236 (11.1) | 503 (7.2)    | Referent      | Referent      | Referent       | Referent      | Referent     | Referent      |
| 1.0-1.5)                             | 3,141 (28.3) | 1,896 (27.0) | --            | --            | -2 (-6; 1)     | -3 (-8; 2)    | --           | --            |
| 1.5-2)                               | 5,625 (50.7) | 3,838 (54.7) | --            | --            | -9 (-12; -6)   | -8 (-12; -3)  | --           | --            |
| ≥2.0                                 | 1,100 (9.9)  | 783 (11.1)   | --            | --            | -15 (-19; -11) | -13 (-18; -7) | --           | --            |
| <i>Explained variance (%)</i>        |              |              | --            | --            | <i>0,51</i>    | <i>0,3</i>    | --           | --            |
| <b>Milk/Yogurt intake</b>            |              |              |               |               |                |               |              |               |
| I quartile                           | 3,039 (27.4) | 2,253 (32.1) | Referent      | Referent      | Referent       | Referent      | Referent     | Referent      |
| II quartile                          | 2,500 (22.5) | 1,485 (21.2) | 0 (-5; 4)     | -4 (-10; 2)   | 0 (-3; 3)      | 0 (-3; 4)     | -2 (-6; 2)   | -3 (-7; 2)    |
| III quartile                         | 4,401 (39.6) | 2,775 (39.5) | -3 (-7; 1)    | -3 (-8; 3)    | -2 (-5; 0)     | 0 (-3; 3)     | -2 (-5; 1)   | 0 (-4; 4)     |
| IV quartile                          | 1,162 (10.5) | 507 (7.2)    | -8 (-13; -3)  | -6 (-15; 3)   | -8 (-12; -4)   | -5 (-9; 0)    | -5 (-10; -1) | -3 (-10; 5)   |
| <i>Explained variance (%)</i>        |              |              | <i>0,2</i>    | <i>0,1</i>    | <i>0,27</i>    | <i>0,1</i>    | <i>0,14</i>  | <i>0,04</i>   |
| <b>Cheese intake</b>                 |              |              |               |               |                |               |              |               |
| I quartile                           | 3,541 (31.9) | 1,892 (26.9) | Referent      | Referent      | Referent       | Referent      | Referent     | Referent      |
| II quartile                          | 3,031 (27.3) | 1,543 (22.0) | --            | --            | 0 (-3; 2)      | 1 (-3; 4)     | --           | --            |
| III quartile                         | 2,771 (25.0) | 1,839 (26.2) | --            | --            | -2 (-5; 0)     | 3 (0; 7)      | --           | --            |
| IV quartile                          | 1,759 (15.8) | 1,746 (24.9) | --            | --            | -2 (-5; 1)     | -4 (-7; 0)    | --           | --            |
| <i>Explained variance (%)</i>        |              |              | --            | --            | <i>0,03</i>    | <i>0,23</i>   | --           | --            |
| <b>Meat intake</b>                   |              |              |               |               |                |               |              |               |
| I quartile                           | 4,199 (37.8) | 2,668 (38.0) | Referent      | Referent      | Referent       | Referent      | Referent     | Referent      |
| II quartile                          | 1,880 (16.9) | 1,171 (16.7) | -6 (-11; -2)  | -4 (-10; 3)   | 0 (-3; 3)      | 5 (1; 9)      | -6 (-9; -2)  | 0 (-5; 6)     |
| III quartile                         | 4,131 (37.2) | 2,682 (38.2) | -5 (-9; -2)   | -5 (-10; 1)   | 2 (-1; 4)      | 2 (-1; 5)     | -3 (-6; 0)   | -1 (-5; 3)    |
| IV quartile                          | 892 (8.1)    | 499 (7.1)    | -11 (-17; -5) | -14 (-22; -5) | -5 (-9; -1)    | -1 (-6; 5)    | -9 (-14; -5) | -10 (-17; -3) |
| <i>Explained variance (%)</i>        |              |              | <i>0,12</i>   | <i>0,15</i>   | <i>0,09</i>    | <i>0,09</i>   | <i>0,1</i>   | <i>0,1</i>    |

| <b>Fish intake</b>                                 |              |              |              |              |             |             |              |               |
|----------------------------------------------------|--------------|--------------|--------------|--------------|-------------|-------------|--------------|---------------|
| I tertile                                          | 6,914 (62.3) | 4,084 (58.2) | Referent     | Referent     | Referent    | Referent    | Referent     | Referent      |
| II tertile                                         | 2,820 (25.4) | 1,905 (27.1) | -2 (-6; 1)   | -6 (-11; -1) | 5 (3; 8)    | 2 (0; 5)    | --           | --            |
| III tertile                                        | 1,368 (12.3) | 1,031 (14.7) | -1 (-6; 4)   | -1 (-7; 6)   | 11 (7; 15)  | 6 (2; 9)    | --           | --            |
| <i>Explained variance (%)</i>                      |              |              | <i>0</i>     | <i>0,1</i>   | <i>0,34</i> | <i>0,12</i> | <i>--</i>    | <i>--</i>     |
| <b>Eggs intake</b>                                 |              |              |              |              |             |             |              |               |
| I quartile                                         | 3,109 (28.0) | 2,102 (29.9) | Referent     | Referent     | Referent    | Referent    | Referent     | Referent      |
| II quartile                                        | 4,392 (39.6) | 3,309 (47.2) | --           | --           | 9 (6; 12)   | 9 (6; 12)   | --           | --            |
| III quartile                                       | 2,408 (21.7) | 1,137 (16.2) | --           | --           | 9 (6; 13)   | 9 (5; 13)   | --           | --            |
| IV quartile                                        | 1,193 (10.7) | 472 (6.7)    | --           | --           | 15 (11; 20) | 7 (1; 13)   | --           | --            |
| <i>Explained variance (%)</i>                      |              |              | <i>--</i>    | <i>--</i>    | <i>0,38</i> | <i>0,38</i> | <i>--</i>    | <i>--</i>     |
| <b>Sweets/snacks/sweet beverages intake</b>        |              |              |              |              |             |             |              |               |
| I quartile                                         | 4,384 (39.5) | 1,956 (27.9) | Referent     | Referent     | Referent    | Referent    | Referent     | Referent      |
| II quartile                                        | 2,599 (23.4) | 2,337 (33.3) | -3 (-7; 2)   | 1 (-6; 8)    | -1 (-4; 2)  | -4 (-7; -1) | -1 (-5; 3)   | -5 (-10; 0)   |
| III quartile                                       | 2,981 (26.9) | 1,574 (22.4) | -2 (-6; 3)   | -4 (-11; 4)  | -1 (-3; 2)  | -3 (-6; 0)  | -2 (-6; 1)   | -6 (-12; 0)   |
| IV quartile                                        | 1,138 (10.2) | 1,153 (16.4) | -7 (-13; -1) | -8 (-16; 1)  | -5 (-8; -1) | -5 (-9; -1) | -7 (-13; -2) | -11 (-17; -4) |
| <i>Explained variance (%)</i>                      |              |              | <i>0,03</i>  | <i>0,03</i>  | <i>0,07</i> | <i>0,12</i> | <i>0,05</i>  | <i>0,11</i>   |
| <b>Bread/pasta/cereals intake</b>                  |              |              |              |              |             |             |              |               |
| I tertile                                          | 4,101 (36.9) | 3,396 (48.4) | Referent     | Referent     | Referent    | Referent    | Referent     | Referent      |
| II tertile                                         | 5,596 (50.4) | 2,284 (32.5) | 1 (-4; 6)    | 5 (-3; 14)   | --          | --          | 2 (-2; 6)    | 1 (-5; 8)     |
| III tertile                                        | 1,405 (12.7) | 1,340 (19.1) | 10 (3; 17)   | 7 (-1; 16)   | --          | --          | 7 (2; 13)    | 6 (-1; 13)    |
| <i>Explained variance (%)</i>                      |              |              | <i>0,03</i>  | <i>0,02</i>  | <i>--</i>   | <i>--</i>   | <i>0,02</i>  | <i>0,02</i>   |
| <b>Fruit/vegetables intake</b>                     |              |              |              |              |             |             |              |               |
| I quartile                                         | 2,890 (26.0) | 2,545 (36.3) | Referent     | Referent     | Referent    | Referent    | Referent     | Referent      |
| II quartile                                        | 3,350 (30.2) | 2,388 (34.0) | 2 (-2; 6)    | -2 (-7; 4)   | 8 (5; 11)   | 5 (1; 8)    | 6 (2; 10)    | 0 (-4; 4)     |
| III quartile                                       | 2,497 (22.5) | 1,279 (18.2) | 3 (-2; 8)    | 5 (-2; 12)   | 7 (3; 10)   | 8 (4; 12)   | 7 (3; 11)    | 6 (1; 12)     |
| IV quartile                                        | 2,365 (21.3) | 808 (11.5)   | 4 (-1; 9)    | 6 (-2; 15)   | 8 (5; 12)   | 9 (5; 14)   | 9 (4; 13)    | 6 (-1; 13)    |
| <i>Explained variance (%)</i>                      |              |              | <i>0,02</i>  | <i>0,05</i>  | <i>0,24</i> | <i>0,3</i>  | <i>0,11</i>  | <i>0,08</i>   |
| <b>Growing vegetables for personal consumption</b> |              |              |              |              |             |             |              |               |
| No                                                 | 5,360 (48.3) | 3,531 (50.3) | Referent     | Referent     | Referent    | Referent    | Referent     | Referent      |
| Yes                                                | 5,742 (51.7) | 3,489 (49.7) | 11 (7; 15)   | -9 (-13; -4) | 14 (11; 17) | 6 (3; 9)    | 11 (8; 14)   | -6 (-9; -2)   |

|                                                 |              |              |              |               |             |              |             |              |
|-------------------------------------------------|--------------|--------------|--------------|---------------|-------------|--------------|-------------|--------------|
| <i>Explained variance (%)</i>                   |              |              | <i>0,92</i>  | <i>0</i>      | <i>2,68</i> | <i>2,23</i>  | <i>1,1</i>  | <i>0,24</i>  |
| <b>Raising animals for personal consumption</b> |              |              |              |               |             |              |             |              |
| No                                              | 8,827 (79.5) | 5,507 (78.5) | Referent     | Referent      | Referent    | Referent     | Referent    | Referent     |
| Yes                                             | 2,275 (20.5) | 1,513 (21.5) | 1 (-3; 6)    | -10 (-16; -5) | 24 (21; 28) | 24 (19; 28)  | --          | --           |
| <i>Explained variance (%)</i>                   |              |              | <i>0</i>     | <i>0,13</i>   | <i>1,21</i> | <i>1,64</i>  | <i>--</i>   | <i>--</i>    |
| <b>Total variance explained (%)</b>             |              |              | <b>34,67</b> | <b>31,18</b>  | <b>23,7</b> | <b>23,21</b> | <b>44,3</b> | <b>34,74</b> |

Abbreviations: AU, Alcohol Units; BMI, Body Mass Index; eGFR, estimated glomerular filtration rate; HDC, Highly Developed Countries; HMPC, High Migratory Pressure Countries; PFOA, perfluorooctanoic acid; PFHxS, perfluorohexanesulfonic acid; PFOS, perfluorooctanesulfonic acid.

*Legend*

*Red Area: the area of the Veneto Region including municipalities supplied by PFAS contaminated waterworks.*

*Red Area A: part of Red Area whose municipalities are located on the groundwater contamination plume.*

*HDC were defined as not Central-Eastern Europe, North America, Oceania, Israel and Japan. HMPC were defined as Central-Eastern Europe, North Africa, Sub-Saharan Africa, Asia except for Israel and Japan, and Central and South America countries. Duration of residency in the Red Area was calculated as the number of years spent in the Red Area between 1980 and 2013 (when granular activated carbon filters were installed). Intake of food items was categorised based on quartiles or tertiles.*

*Predictors shown for each PFAS were selected using a stepwise approach based on the Akaike information criterion (AIC).*

*Values of % difference were derived from Beta coefficients.*

**Table S3. Multivariable linear regression models for the association between potential predictors and serum concentrations of PFOA, PFOS, and PFHxS in the subset of study population recruited after August 2018 (n=3,605 subjects with complete records for all variables).**

| Predictor                           | n (%)        | PFOA                  | PFOS                  | PFHxS                 |
|-------------------------------------|--------------|-----------------------|-----------------------|-----------------------|
|                                     |              | % difference (95% CI) | % difference (95% CI) | % difference (95% CI) |
| <b>Gender</b>                       |              |                       |                       |                       |
| Female                              | 1,928 (53.5) | Referent              | Referent              | Referent              |
| Male                                | 1,677 (46.5) | 88 (72, 106)          | 50 (43, 59)           | 148 (131, 166)        |
| <i>Explained variance (%)</i>       |              | 18,2                  | 14,3                  | 26,4                  |
| <b>Age (years)</b>                  |              |                       |                       |                       |
| 14-19                               | 53 (1.5)     | Referent              | Referent              | Referent              |
| 20-24                               | 89 (2.5)     | -9 (-38, 35)          | 14 (-9, 42)           | -4 (-29, 31)          |
| 25-29                               | 268 (7.4)    | -8 (-34, 30)          | 41 (16, 71)           | 9 (-17, 43)           |
| 30-34                               | 1,094 (30.3) | -7 (-32, 28)          | 36 (14, 63)           | 20 (-7, 55)           |
| 35-39                               | 2,101 (58.3) | 13 (-17, 53)          | 56 (31, 86)           | 36 (6, 74)            |
| <i>Explained variance (%)</i>       |              | 0,2                   | 0,5                   | 0,2                   |
| <b>Country of birth</b>             |              |                       |                       |                       |
| Italy, HDC                          | 3,176 (88.1) | Referent              | Referent              | Referent              |
| HMPC                                | 429 (11.9)   | --                    | --                    | 19 (8, 31)            |
| <i>Explained variance (%)</i>       |              | --                    | --                    | 0,2                   |
| <b>Educational level</b>            |              |                       |                       |                       |
| Primary/Middle school               | 747 (20.7)   | Referent              | Referent              | Referent              |
| High school                         | 2,005 (55.6) | 0 (-8, 10)            | 2 (-3, 7)             | 4 (-3, 12)            |
| University                          | 853 (23.7)   | 10 (-1, 22)           | 10 (3, 17)            | 14 (5, 24)            |
| <i>Explained variance (%)</i>       |              | 0,6                   | 0,5                   | 0,5                   |
| <b>Occupational sector</b>          |              |                       |                       |                       |
| Non-farmer                          | 3,534 (98.0) | Referent              | Referent              | Referent              |
| Farmer                              | 71 (2.0)     | --                    | --                    | 17 (-3, 41)           |
| <i>Explained variance (%)</i>       |              | --                    | --                    | 0                     |
| <b>Predominant residential area</b> |              |                       |                       |                       |

|                                                            |              |                  |                |                  |
|------------------------------------------------------------|--------------|------------------|----------------|------------------|
| Red Area B                                                 | 2,110 (58.5) | Referent         | Referent       | Referent         |
| Red area A                                                 | 1,495 (41.5) | 21 (7, 36)       | --             | 25 (14, 38)      |
| <i>Explained variance (%)</i>                              |              | <i>0,2</i>       | <i>--</i>      | <i>0,4</i>       |
| <b>Current municipality of residency (Red Area A or B)</b> |              |                  |                |                  |
| Terrazzo (B)                                               | 54 (1.5)     | Referent         | Referent       | Referent         |
| Albaredo D'Adige (B)                                       | 334 (9.3)    | 134 (76, 211)    | 28 (9, 51)     | 107 (65, 159)    |
| Arcole (B)                                                 | 404 (11.2)   | 146 (86, 226)    | 32 (13, 55)    | 99 (59, 149)     |
| Bevilacqua (B)                                             | 42 (1.2)     | 207 (108, 355)   | 33 (7, 66)     | 189 (111, 294)   |
| Bonavigo (B)                                               | 74 (2.1)     | 114 (52, 201)    | 13 (-7, 37)    | 102 (54, 164)    |
| Boschi Sant'Anna (B)                                       | 34 (0.9)     | 149 (64, 278)    | 34 (6, 70)     | 110 (51, 192)    |
| Legnago (B)                                                | 688 (19.1)   | 44 (10, 89)      | 11 (-5, 29)    | 36 (9, 68)       |
| Minerbe (B)                                                | 115 (3.2)    | 237 (146, 361)   | 34 (12, 60)    | 180 (118, 259)   |
| Veronella (B)                                              | 436 (12.1)   | 250 (164, 363)   | 43 (22, 68)    | 184 (127, 255)   |
| Alonte (A)                                                 | 9 (0.3)      | 134 (16, 372)    | -3 (-34, 44)   | 124 (28, 291)    |
| Asigliano Veneto (A)                                       | 1 (0.0)      | 319 (-40, 2,804) | 109 (-30, 523) | 251 (-25, 1,542) |
| Brendola (A)                                               | 12 (0.3)     | 180 (50, 424)    | 20 (-16, 69)   | 65 (0, 71)       |
| Cologna Veneta (A)                                         | 550 (15.3)   | 236 (150, 352)   | 57 (34, 84)    | 188 (127, 265)   |
| Lonigo (A)                                                 | 56 (1.6)     | 169 (81, 298)    | 57 (27, 95)    | 160 (90, 256)    |
| Montagnana (A)                                             | 16 (0.5)     | 203 (73, 431)    | 48 (9, 103)    | 143 (56, 280)    |
| Noventa Vicentina (A)                                      | 30 (0.8)     | 136 (49, 274)    | 32 (2, 70)     | 78 (23, 156)     |
| Pojana Maggiore (A)                                        | 11 (0.3)     | 230 (72, 533)    | 41 (-2, 103)   | 192 (74, 390)    |
| Pressana (A)                                               | 179 (5.0)    | 233 (142, 358)   | 41 (19, 68)    | 162 (103, 238)   |
| Roveredo Di Gua' (A)                                       | 141 (3.9)    | 199 (116, 316)   | 44 (21, 72)    | 153 (95, 229)    |
| Sarego (A)                                                 | 20 (0.6)     | 105 (22, 246)    | 34 (1, 79)     | 71 (13, 160)     |
| Zimella (A)                                                | 399 (11.1)   | 218 (135, 329)   | 64 (40, 93)    | 165 (108, 237)   |
| <i>Explained variance (%)</i>                              |              | <i>11,1</i>      | <i>4,2</i>     | <i>12,4</i>      |
| <b>Duration of residency in the Red Area (years)</b>       |              |                  |                |                  |
| <5                                                         | 339 (9.4)    | Referent         | Referent       | Referent         |
| 5-9                                                        | 417 (11.6)   | 47 (28, 69)      | 10 (2, 19)     | 30 (16, 46)      |
| 10-14                                                      | 266 (7.4)    | 84 (56, 117)     | 19 (8, 31)     | 57 (37, 79)      |
| 15-19                                                      | 137 (3.8)    | 94 (53, 146)     | 14 (0, 30)     | 85 (53, 124)     |



|                                                                                |              |                |                |                |
|--------------------------------------------------------------------------------|--------------|----------------|----------------|----------------|
| 20-24                                                                          | 232 (6.4)    | 108 (70, 155)  | 10 (-2, 24)    | 108 (76, 145)  |
| 25-29                                                                          | 892 (24.7)   | 119 (91, 152)  | 19 (9, 28)     | 115 (92, 141)  |
| ≥30                                                                            | 1,322 (36.7) | 101 (78, 127)  | 12 (4, 20)     | 102 (82, 124)  |
| <i>Explained variance (%)</i>                                                  |              | 3,5            | 0,5            | 3,6            |
| <b>Time-lag between the beginning of the study and blood sampling (months)</b> |              |                |                |                |
| 16-20                                                                          | 2,295 (63.7) | Referent       | Referent       | Referent       |
| ≥21                                                                            | 1,310 (36.3) | -13 (-20, -5)  | -5 (-9, -1)    | -10 (-16, -4)  |
| <i>Explained variance (%)</i>                                                  |              | 0,3            | 0,1            | 0,2            |
| <b>BMI (kg/m<sup>2</sup>)</b>                                                  |              |                |                |                |
| <18.0                                                                          | 151 (4.2)    | -11 (-25, 4)   | -8 (-16, 1)    | -15 (-25, -3)  |
| 18.0-24.9                                                                      | 2,088 (57.9) | Referent       | Referent       | Referent       |
| 25.0-29.9                                                                      | 992 (27.5)   | -9 (-15, -2)   | -4 (-8, 0)     | -2 (-8, 4)     |
| ≥30.0                                                                          | 374 (10.4)   | -7 (-16, 4)    | -13 (-18, -7)  | 0 (-9, 9)      |
| <i>Explained variance (%)</i>                                                  |              | 0,4            | 0,7            | 0,1            |
| <b>Number of deliveries</b>                                                    |              |                |                |                |
| 0                                                                              | 2,447 (67.9) | Referent       | Referent       | Referent       |
| 1                                                                              | 441 (12.2)   | -37 (-44, -29) | -13 (-18, -7)  | -20 (-27, -12) |
| 2                                                                              | 556 (15.4)   | -52 (-57, -47) | -21 (-26, -16) | -33 (-39, -27) |
| ≥3                                                                             | 161 (4.5)    | -58 (-65, -50) | -12 (-20, -3)  | -34 (-43, -25) |
| <i>Explained variance (%)</i>                                                  |              | 3,4            | 1,1            | 1,3            |
| <b>Smoking habit</b>                                                           |              |                |                |                |
| Never                                                                          | 2,020 (56.0) | Referent       | Referent       | Referent       |
| Current                                                                        | 872 (24.2)   | --             | -5 (-10, -1)   | --             |
| Former                                                                         | 713 (19.8)   | --             | -2 (-7, 3)     | --             |
| <i>Explained variance (%)</i>                                                  |              | --             | 0,1            | --             |
| <b>Alcohol intake (AU per week)</b>                                            |              |                |                |                |
| Never                                                                          | 1,083 (30.0) | Referent       | Referent       | Referent       |
| 1-2                                                                            | 1,412 (39.2) | 7 (-1, 16)     | 7 (3, 13)      | --             |
| 3-6                                                                            | 654 (18.1)   | 15 (4, 27)     | 8 (2, 15)      | --             |
| ≥7                                                                             | 456 (12.7)   | 15 (2, 29)     | 16 (8, 24)     | --             |
| <i>Explained variance (%)</i>                                                  |              | 0,6            | 0,5            |                |

| <b>Water intake (liters per day)</b>     |              |                |                |                |
|------------------------------------------|--------------|----------------|----------------|----------------|
| <1.0                                     | 322 (8.9)    | Referent       | Referent       | Referent       |
| 1.0-1.5)                                 | 1,110 (30.8) | --             | -10 (-16, -4)  | --             |
| 1.5-2)                                   | 1,876 (52.0) | --             | -16 (-21, -10) | --             |
| ≥2.0                                     | 297 (8.3)    | --             | -25 (-32, -18) | --             |
| <i>Explained variance (%)</i>            |              | --             | 0,8            | --             |
| <b>Type of drinking water source</b>     |              |                |                |                |
| Mixed                                    | 1,252 (34.7) | Referent       | Referent       | Referent       |
| Only public water                        | 234 (6.5)    | 30 (13, 50)    | 10 (1, 19)     | 27 (13, 42)    |
| Only bottled water                       | 2,119 (58.8) | -21 (-27, -15) | -3 (-7, 2)     | -21 (-26, -16) |
| <i>Explained variance (%)</i>            |              | 1              | 0,2            | 1,1            |
| <b>Consumption of private well water</b> |              |                |                |                |
| No                                       | 3,188 (88.4) | Referent       | Referent       | Referent       |
| Yes                                      | 417 (11.6)   | -47 (-53, -40) | -10 (-16, -4)  | -43 (-48, -37) |
| <i>Explained variance (%)</i>            |              | 1,9            | 0,2            | 1,9            |
| <b>Cheese intake</b>                     |              |                |                |                |
| I quartile                               | 945 (26.2)   | Referent       | Referent       | Referent       |
| II quartile                              | 884 (24.5)   | --             | -2 (-7, 3)     | -8 (-14, -1)   |
| III quartile                             | 1,058 (29.4) | --             | -2 (-6, 3)     | -5 (-11, 2)    |
| IV quartile                              | 718 (19.9)   | --             | -7 (-12, -2)   | -9 (-16, -2)   |
| <i>Explained variance (%)</i>            |              | --             | 0,2            | 0,3            |
| <b>Meat intake</b>                       |              |                |                |                |
| I quartile                               | 1,705 (47.3) | Referent       | Referent       | Referent       |
| II quartile                              | 591 (16.4)   | --             | 6 (1, 12)      | --             |
| III quartile                             | 1,202 (33.3) | --             | 5 (1, 10)      | --             |
| IV quartile                              | 107 (3.0)    | --             | 5 (-6, 17)     | --             |
| <i>Explained variance (%)</i>            |              | --             | 0,2            | --             |
| <b>Fish intake</b>                       |              |                |                |                |
| I tertile                                | 2,176 (60.4) | Referent       | Referent       | Referent       |
| II tertile                               | 967 (26.8)   | -8 (-14, -1)   | 4 (0, 9)       | --             |
| III tertile                              | 462 (12.8)   | -6 (-15, 4)    | 8 (2, 14)      | --             |

|                                                    |              |               |               |               |
|----------------------------------------------------|--------------|---------------|---------------|---------------|
| <i>Explained variance (%)</i>                      |              | <i>0,1</i>    | <i>0,2</i>    | <i>--</i>     |
| <b>Eggs intake</b>                                 |              |               |               |               |
| I quartile                                         | 1,102 (30.6) | Referent      | Referent      | Referent      |
| II quartile                                        | 1,774 (49.2) | -4 (-11, 3)   | 7 (3, 12)     | -2 (-7, 4)    |
| III quartile                                       | 523 (14.5)   | -2 (-11, 9)   | 8 (2, 14)     | -1 (-9, 8)    |
| IV quartile                                        | 206 (5.7)    | -19 (-30, -6) | 12 (3, 22)    | -15 (-25, -4) |
| <i>Explained variance (%)</i>                      |              | <i>0,4</i>    | <i>0,3</i>    | <i>0,2</i>    |
| <b>Bread/pasta/cereals intake</b>                  |              |               |               |               |
| I tertile                                          | 1,809 (50.2) | Referent      | Referent      | Referent      |
| II tertile                                         | 1,208 (33.5) | --            | 2 (-3, 6)     | --            |
| III tertile                                        | 588 (16.3)   | --            | -4 (-9, 1)    | --            |
| <i>Explained variance (%)</i>                      |              | <i>--</i>     | <i>0,1</i>    | <i>--</i>     |
| <b>Fruit/vegetables intake</b>                     |              |               |               |               |
| I quartile                                         | 948 (26.3)   | Referent      | Referent      | Referent      |
| II quartile                                        | 1,352 (37.5) | --            | 6 (2, 12)     | --            |
| III quartile                                       | 773 (21.4)   | --            | 8 (2, 14)     | --            |
| IV quartile                                        | 532 (14.8)   | --            | 11 (5, 19)    | --            |
| <i>Explained variance (%)</i>                      |              | <i>--</i>     | <i>0,2</i>    | <i>--</i>     |
| <b>Growing vegetables for personal consumption</b> |              |               |               |               |
| No                                                 | 1,437 (39.9) | Referent      | Referent      | Referent      |
| Yes                                                | 2,168 (60.1) | --            | 10 (5, 15)    | 7 (1, 13)     |
| <i>Explained variance (%)</i>                      |              | <i>--</i>     | <i>4,8</i>    | <i>2,7</i>    |
| <b>Raising animals for personal consumption</b>    |              |               |               |               |
| No                                                 | 2,335 (64.8) | Referent      | Referent      | Referent      |
| Yes                                                | 1,270 (35.2) | --            | 24 (18, 29)   | --            |
| <i>Explained variance (%)</i>                      |              | <i>--</i>     | <i>2,5</i>    | <i>--</i>     |
| <b>Total variance explained</b>                    |              | <b>40,80%</b> | <b>30,60%</b> | <b>50,80%</b> |

Abbreviations: AU, Alcohol Units; BMI, Body Mass Index; eGFR, estimated glomerular filtration rate; HDC, Highly Developed Countries; HMPC, High Migratory Pressure Countries; PFOA, perfluorooctanoic acid; PFHxS, perfluorohexanesulfonic acid; PFOS, perfluorooctanesulfonic acid.

Legend

*Red Area: the area of the Veneto Region including municipalities supplied by PFAS contaminated waterworks.*

*Red Area A: part of Red Area whose municipalities are located on the groundwater contamination plume.*

*Red Area B: part of Red Area whose municipalities are located outside the groundwater contamination plume.*

*HDC were defined as not Central-Eastern Europe, North America, Oceania, Israel and Japan. HMPC were defined as Central-Eastern Europe, North Africa, Sub-Saharan Africa, Asia except for Israel and Japan, and Central and South America countries. Duration of residency in the Red Area was calculated as the number of years spent in the Red Area between 1980 and 2013 (when granular activated carbon filters were installed). Intake of food items was categorised based on quartiles or tertiles.*

*Predictors shown for each PFAS were selected using a stepwise approach based on the Akaike information criterion (AIC).*

*Values of % difference were derived from Beta coefficients.*



|                                                            |             |             |               |                |               |              |                |                |
|------------------------------------------------------------|-------------|-------------|---------------|----------------|---------------|--------------|----------------|----------------|
| Farmer                                                     | 43 (2.88)   | 28 (1.33)   | --            | --             | --            | --           | 20 (-5 ,53)    | 0 (-26 ,34)    |
| <i>Explained variance (%)</i>                              |             |             | --            | --             | --            | --           | 0,02           | 0,01           |
| <b>Current municipality of residency (Red Area A or B)</b> |             |             |               |                |               |              |                |                |
| Terrazzo (B)                                               |             | 52 (2.46)   | --            | Referent       | --            | Referent     | --             | Referent       |
| Albaredo D'Adige (B)                                       |             | 318 (15.07) | --            | 148 (84 ;236)  | --            | 29 (9 ,53)   | --             | 117 (71 ,175)  |
| Arcole (B)                                                 |             | 369 (17.49) | --            | 166 (97 ;258)  | --            | 34 (14 ,58)  | --             | 109 (65 ,164)  |
| Bevilacqua (B)                                             |             | 37 (1.75)   | --            | 260 (136 ;447) | --            | 41 (12 ,77)  | --             | 217 (128 ,340) |
| Bonavigo (B)                                               |             | 72 (3.41)   | --            | 123 (56 ;218)  | --            | 13 (-7 ,37)  | --             | 109 (58 ,176)  |
| Boschi Sant'Anna (B)                                       |             | 31 (1.47)   | --            | 168 (72 ;317)  | --            | 29 (1 ,65)   | --             | 117 (53 ,207)  |
| Legnago (B)                                                |             | 671 (31.8)  | --            | 47 (11 ;95)    | --            | 10 (-6 ,28)  | --             | 37 (10 ,71)    |
| Minerbe (B)                                                |             | 105 (4.98)  | --            | 245 (148 ;380) | --            | 35 (13 ,62)  | --             | 186 (121 ,271) |
| Veronella (B)                                              |             | 357 (16.92) | --            | 280 (182 ;412) | --            | 41 (19 ,67)  | --             | 195 (133 ,273) |
| Other (B)                                                  |             | 98 (4.64)   | --            | 234 (137 ;370) | --            | 66 (37 ,101) | --             | 191 (122 ,280) |
| Brendola (A)                                               | 12 (0.8)    | --          | Referent      | --             | Referent      | --           | Referent       | --             |
| Alonte (A)                                                 | 9 (0.6)     | --          | -26 (-67 ,67) | --             | -20 (-51 ,30) | --           | 30 (-33 ,153)  | --             |
| Asigliano Veneto (A)                                       | 1 (0.07)    | --          | 33 (-81 ,823) | --             | 77 (-44 ,458) | --           | 125 (-53 ,983) | --             |
| Cologna Veneta (A)                                         | 509 (34.05) | --          | 9 (-37 ,89)   | --             | 23 (-11 ,71)  | --           | 63 (4 ,155)    | --             |
| Lonigo (A)                                                 | 55 (3.68)   | --          | -2 (-46 ,76)  | --             | 30 (-8 ,85)   | --           | 66 (3 ,169)    | --             |
| Montagnana (A)                                             | 15 (1)      | --          | -4 (-53 ,96)  | --             | 26 (-17 ,92)  | --           | 40 (-22 ,152)  | --             |
| Noventa Vicentina (A)                                      | 30 (2.01)   | --          | -18 (-57 ,55) | --             | 9 (-25 ,59)   | --           | 9 (-35 ,83)    | --             |
| Pojana Maggiore (A)                                        | 11 (0.74)   | --          | 15 (-47 ,151) | --             | 17 (-26 ,85)  | --           | 76 (-7 ,231)   | --             |
| Pressana (A)                                               | 166 (11.1)  | --          | 8 (-39 ,89)   | --             | 9 (-22 ,52)   | --           | 47 (-7 ,133)   | --             |
| Roveredo Di Gua' (A)                                       | 132 (8.83)  | --          | 3 (-41 ,82)   | --             | 12 (-20 ,57)  | --           | 47 (-8 ,132)   | --             |
| Sarego (A)                                                 | 20 (1.34)   | --          | -32 (-65 ,35) | --             | 11 (-26 ,65)  | --           | 2 (-41 ,78)    | --             |
| Zimella (A)                                                | 366 (24.48) | --          | 2 (-41 ,77)   | --             | 30 (-6 ,80)   | --           | 51 (-4 ,135)   | --             |
| Other (A)                                                  | 169 (11.3)  | --          | -8 (-48 ,61)  | --             | 11 (-21 ,54)  | --           | 37 (-13 ,117)  | --             |
| <i>Explained variance (%)</i>                              |             |             | 1,73          | 8,66           | 2,86          | 2,76         | 2,77           | 9,25           |
| <b>Duration of residency in the Red Area (years)</b>       |             |             |               |                |               |              |                |                |
| <5                                                         | 107 (7.16)  | 232 (11)    | Referent      | Referent       | Referent      | Referent     | Referent       | Referent       |
| 5-9                                                        | 124 (8.29)  | 293 (13.89) | 43 (12 ,83)   | 49 (25 ;77)    | 11 (-4 ,29)   | 9 (-1 ,20)   | 28 (4 ,58)     | 32 (16 ,52)    |
| 10-14                                                      | 108 (7.22)  | 158 (7.49)  | 75 (34 ,130)  | 88 (52 ;131)   | 31 (11 ,53)   | 14 (1 ,27)   | 59 (27 ,98)    | 57 (33 ,85)    |

|                                                                                |               |               |                |                |                |                |                |                |
|--------------------------------------------------------------------------------|---------------|---------------|----------------|----------------|----------------|----------------|----------------|----------------|
| 15-19                                                                          | 78 (5.22)     | 59 (2.8)      | 95 (38 ,175)   | 88 (35 ;163)   | 25 (2 ,53)     | 7 (-11 ,28)    | 88 (42 ,149)   | 74 (34 ,126)   |
| 20-24                                                                          | 126 (8.43)    | 106 (5.02)    | 88 (41 ,150)   | 119 (61 ;197)  | 19 (1 ,41)     | 5 (-11 ,25)    | 92 (52 ,144)   | 108 (64 ,165)  |
| 25-29                                                                          | 484 (32.37)   | 408 (19.34)   | 84 (49 ,128)   | 148 (105 ;199) | 22 (8 ,39)     | 17 (5 ,30)     | 89 (57 ,127)   | 130 (98 ,168)  |
| ≥30                                                                            | 468 (31.3)    | 854 (40.47)   | 102 (63 ,151)  | 103 (74 ;137)  | 29 (13 ,46)    | 5 (-4 ,14)     | 103 (69 ,144)  | 104 (80 ,131)  |
| <i>Explained variance (%)</i>                                                  |               |               | <i>2,94</i>    | <i>4,26</i>    | <i>1,21</i>    | <i>0,47</i>    | <i>2,84</i>    | <i>4,73</i>    |
| <b>Time-lag between the beginning of the study and blood sampling (months)</b> |               |               |                |                |                |                |                |                |
| 16-20                                                                          | 841 (56.25)   | 1454 (68.91)  | Referent       | Referent       | Referent       | Referent       | Referent       | Referent       |
| ≥21                                                                            | 654 (43.75)   | 656 (31.09)   | -4 (-15 ,8)    | -16 (-25 ;-6)  | -8 (-14 ,-1)   | -2 (-8 ,4)     | -6 (-15 ,3)    | -11 (-19 ,-3)  |
| <i>Explained variance (%)</i>                                                  |               |               | <i>0,03</i>    | <i>0,41</i>    | <i>0,24</i>    | <i>0,04</i>    | <i>0,10</i>    | <i>0,30</i>    |
| <b>BMI (kg/m<sup>2</sup>)</b>                                                  |               |               |                |                |                |                |                |                |
| <18.0                                                                          | 56 (3.75)     | 95 (4.5)      | 13 (-12 ,46)   | -25 (-40 ;-8)  | 2 (-12 ,19)    | -14 (-23 ,-3)  | -1 (-20 ,22)   | -24 (-35 ,-10) |
| 18.0-24.9                                                                      | 866 (57.93)   | 1222 (57.91)  | Referent       | Referent       | Referent       | Referent       | Referent       | Referent       |
| 25.0-29.9                                                                      | 413 (27.63)   | 579 (27.44)   | -5 (-16 ,6)    | -11 (-19 ;-1)  | 0 (-6 ,7)      | -6 (-11 ,0)    | 0 (-9 ,10)     | -3 (-10 ,5)    |
| ≥30.0                                                                          | 160 (10.7)    | 214 (10.14)   | 1 (-14 ,19)    | -13 (-25 ;1)   | -11 (-19 ,-2)  | -15 (-21 ,-8)  | 0 (-13 ,14)    | -3 (-14 ,9)    |
| <i>Explained variance (%)</i>                                                  |               |               | <i>0,24</i>    | <i>0,64</i>    | <i>0,43</i>    | <i>1,13</i>    | <i>0,04</i>    | <i>0,24</i>    |
| <b>Number of deliveries</b>                                                    |               |               |                |                |                |                |                |                |
| 0                                                                              | 1,040 (69.57) | 1,407 (66.68) | Referent       | Referent       | Referent       | Referent       | Referent       | Referent       |
| 1                                                                              | 170 (11.37)   | 271 (12.84)   | -49 (-57 ,-39) | -29 (-39 ;-17) | -20 (-28 ,-11) | -9 (-16 ,-1)   | -31 (-41 ,-21) | -13 (-23 ,-2)  |
| 2                                                                              | 212 (14.18)   | 344 (16.3)    | -59 (-66 ,-52) | -48 (-55 ;-40) | -23 (-30 ,-14) | -22 (-28 ,-16) | -41 (-49 ,-32) | -29 (-37 ,-21) |
| ≥3                                                                             | 73 (4.88)     | 88 (4.17)     | -65 (-73 ,-55) | -51 (-61 ;-38) | -18 (-29 ,-4)  | -9 (-20 ,4)    | -45 (-55 ,-32) | -25 (-37 ,-9)  |
| <i>Explained variance (%)</i>                                                  |               |               | <i>5,51</i>    | <i>2,71</i>    | <i>1,42</i>    | <i>1,27</i>    | <i>2,29</i>    | <i>0,99</i>    |
| <b>Smoking habit</b>                                                           |               |               |                |                |                |                |                |                |
| Never                                                                          | 868 (58.06)   | 1152 (54.6)   | Referent       | Referent       | Referent       | Referent       | Referent       | Referent       |
| Current                                                                        | 383 (25.62)   | 489 (23.18)   | --             | --             | -2 (-9 ,5)     | -7 (-12 ,-1)   | --             | --             |
| Former                                                                         | 244 (16.32)   | 469 (22.23)   | --             | --             | -7 (-15 ,1)    | 1 (-5 ,7)      | --             | --             |
| <i>Explained variance (%)</i>                                                  |               |               | <i>--</i>      | <i>--</i>      | <i>0,10</i>    | <i>0,12</i>    | <i>--</i>      | <i>--</i>      |
| <b>Alcohol intake (AU per week)</b>                                            |               |               |                |                |                |                |                |                |
| Never                                                                          | 457 (30.57)   | 626 (29.67)   | Referent       | Referent       | Referent       | Referent       | Referent       | Referent       |
| 1-2                                                                            | 551 (36.86)   | 861 (40.81)   | 12 (-1 ,26)    | 5 (-6 ;17)     | 0 (-7 ,8)      | 13 (6 ,20)     | --             | --             |
| 3-6                                                                            | 306 (20.47)   | 348 (16.49)   | 20 (3 ,39)     | 13 (-2 ;30)    | 0 (-9 ,9)      | 15 (6 ,24)     | --             | --             |





|                                                    |             |              |               |               |              |              |              |               |
|----------------------------------------------------|-------------|--------------|---------------|---------------|--------------|--------------|--------------|---------------|
| II tertile                                         | 411 (27.49) | 556 (26.35)  | -2 (-12 ,10)  | -11 (-19 ;-2) | 10 (3 ,17)   | 1 (-4 ,7)    | --           | --            |
| III tertile                                        | 202 (13.51) | 260 (12.32)  | -10 (-23 ,4)  | 0 (-13 ;14)   | 14 (4 ,24)   | 3 (-4 ,11)   | --           | --            |
| <i>Explained variance (%)</i>                      |             |              | <i>0,06</i>   | <i>0,23</i>   | <i>0,58</i>  | <i>0,02</i>  | --           | --            |
| <b>Eggs intake</b>                                 |             |              |               |               |              |              |              |               |
| I quartile                                         | 435 (29.1)  | 667 (31.61)  | Referent      | Referent      | Referent     | Referent     | Referent     | Referent      |
| II quartile                                        | 728 (48.7)  | 1046 (49.57) | -2 (-12 ,10)  | -5 (-14 ;5)   | 5 (-2 ,12)   | 9 (4 ,15)    | -2 (-10 ,8)  | -2 (-9 ,6)    |
| III quartile                                       | 229 (15.32) | 294 (13.93)  | -4 (-18 ,12)  | 1 (-12 ;16)   | 10 (0 ,20)   | 8 (0 ,17)    | -4 (-15 ,9)  | 2 (-8 ,14)    |
| IV quartile                                        | 103 (6.89)  | 103 (4.88)   | -21 (-36 ,-3) | -19 (-35 ;0)  | 13 (0 ,28)   | 11 (-1 ,25)  | -14 (-28 ,1) | -19 (-31 ,-4) |
| <i>Explained variance (%)</i>                      |             |              | <i>0,62</i>   | <i>0,43</i>   | <i>0,19</i>  | <i>0,39</i>  | <i>0,34</i>  | <i>0,29</i>   |
| <b>Bread/pasta/cereals intake</b>                  |             |              |               |               |              |              |              |               |
| I tertile                                          | 598 (40)    | 1211 (57.39) | Referent      | Referent      | Referent     | Referent     | Referent     | Referent      |
| II tertile                                         | 593 (39.67) | 615 (29.15)  | --            | --            | 4 (-3 ,11)   | -1 (-6 ,5)   | --           | --            |
| III tertile                                        | 304 (20.33) | 284 (13.46)  | --            | --            | -6 (-13 ,1)  | -2 (-9 ,6)   | --           | --            |
| <i>Explained variance (%)</i>                      |             |              | --            | --            | <i>0,26</i>  | <i>0,00</i>  | --           | --            |
| <b>Fruit/vegetables intake</b>                     |             |              |               |               |              |              |              |               |
| I quartile                                         | 341 (22.81) | 607 (28.77)  | Referent      | Referent      | Referent     | Referent     | Referent     | Referent      |
| II quartile                                        | 551 (36.86) | 801 (37.96)  | --            | --            | 5 (-2 ,14)   | 6 (0 ,13)    | --           | --            |
| III quartile                                       | 342 (22.88) | 431 (20.43)  | --            | --            | 6 (-3 ,16)   | 9 (1 ,17)    | --           | --            |
| IV quartile                                        | 261 (17.46) | 271 (12.84)  | --            | --            | 9 (0 ,20)    | 14 (5 ,24)   | --           | --            |
| <i>Explained variance (%)</i>                      |             |              | --            | --            | <i>0,15</i>  | <i>0,30</i>  | --           | --            |
| <b>Growing vegetables for personal consumption</b> |             |              |               |               |              |              |              |               |
| No                                                 | 496 (33.18) | 941 (44.6)   | Referent      | Referent      | Referent     | Referent     | Referent     | Referent      |
| Yes                                                | 999 (66.82) | 1169 (55.4)  | --            | --            | 14 (6 ,23)   | 8 (2 ,14)    | 10 (1 ,21)   | 5 (-3 ,13)    |
| <i>Explained variance (%)</i>                      |             |              | --            | --            | <i>3,88</i>  | <i>4,46</i>  | <i>1,63</i>  | <i>2,20</i>   |
| <b>Raising animals for personal consumption</b>    |             |              |               |               |              |              |              |               |
| No                                                 | 892 (59.67) | 1443 (68.39) | Referent      | Referent      | Referent     | Referent     | Referent     | Referent      |
| Yes                                                | 603 (40.33) | 667 (31.61)  | --            | --            | 19 (11 ,27)  | 26 (19 ,34)  | --           | --            |
| <i>Explained variance (%)</i>                      |             |              | --            | --            | <i>2,03</i>  | <i>2,65</i>  | --           | --            |
| <b>Total variance explained (%)</b>                |             |              | <b>40,63</b>  | <b>37,96</b>  | <b>32,45</b> | <b>31,15</b> | <b>51,84</b> | <b>46,07</b>  |

Abbreviations: AU, Alcohol Units; BMI, Body Mass Index; eGFR, estimated glomerular filtration rate; HDC, Highly Developed Countries; HMPC, High Migratory Pressure Countries; PFOA, perfluorooctanoic acid; PFHxS, perfluorohexanesulfonic acid; PFOS, perfluorooctanesulfonic acid.

*Legend*

*Red Area: the area of the Veneto Region including municipalities supplied by PFAS contaminated waterworks.*

*Red Area A: part of Red Area whose municipalities are located on the groundwater contamination plume.*

*HDC were defined as not Central-Eastern Europe, North America, Oceania, Israel and Japan. HMPC were defined as Central-Eastern Europe, North Africa, Sub-Saharan Africa, Asia except for Israel and Japan, and Central and South America countries. Duration of residency in the Red Area was calculated as the number of years spent in the Red Area between 1980 and 2013 (when granular activated carbon filters were installed). Intake of food items was categorised based on quartiles or tertiles.*

*Predictors shown for each PFAS were selected using a stepwise approach based on the Akaike information criterion (AIC).*

*Values of % difference were derived from Beta coefficients.*

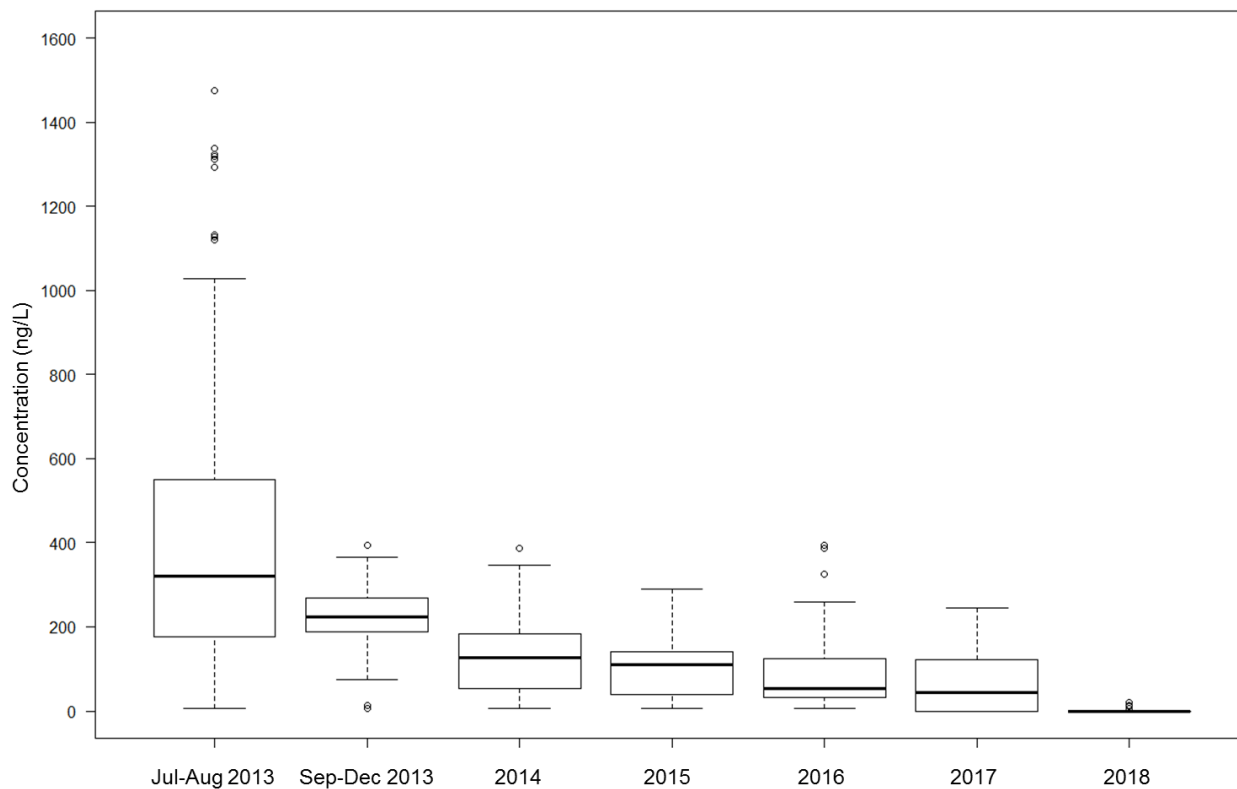

**Figure S1 - Concentrations of PFOA in drinking water from waterworks of the Red Area, by time period.**

*PFOA, perfluorooctanoic acid.*

*Number of samples: Jul-Aug 2013: n=152; Sep-Dec 2013: n=115; 2014: n=359; 2015: n=317; 2016: n=272; 2017: n=340; 2018: n=228.*

*The Limit of Quantification (LOQ) was 10 ng/L until September 2017; thereafter it was reduced at 5 ng/L. Samples with a value <LOQ were assigned a value equal to half the LOQ.*

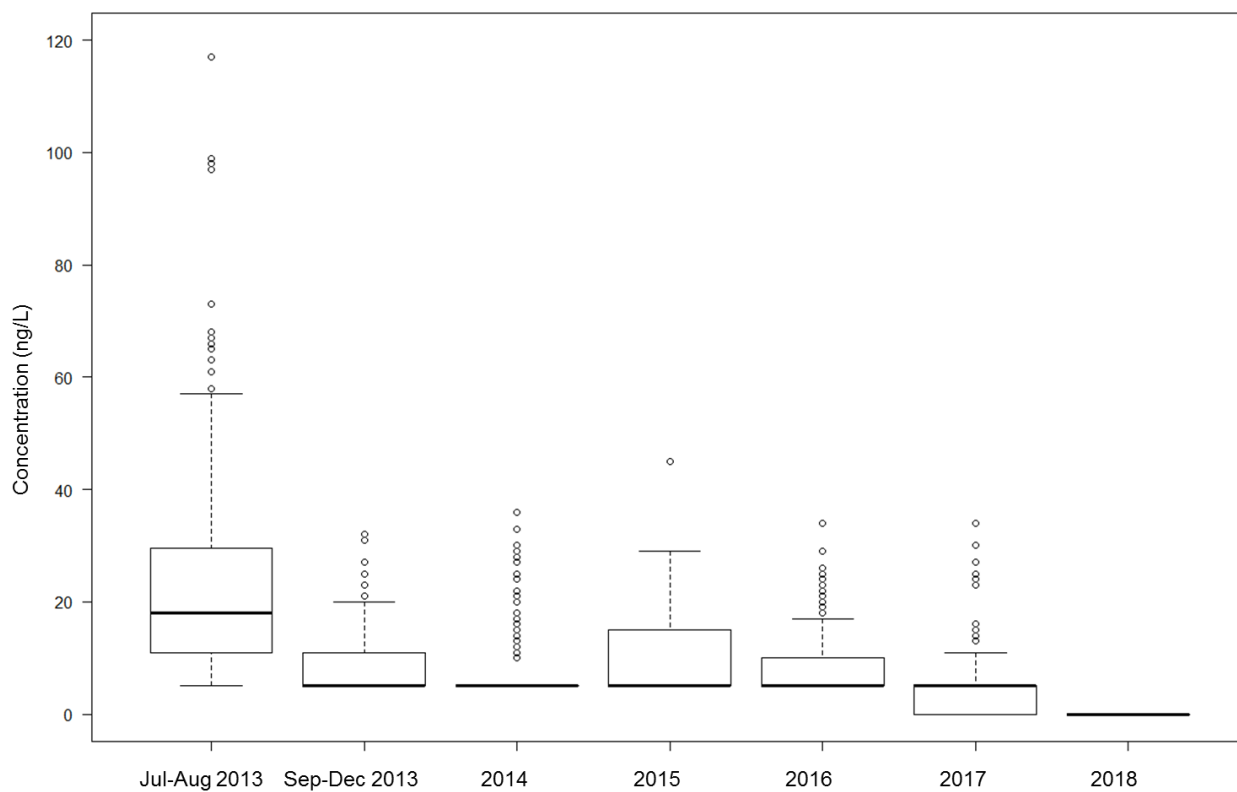

**Figure S2 - Concentrations of PFOS in drinking water from waterworks of the Red Area, by time period.**

*PFOS, perfluorooctanesulfonic acid.*

*Number of samples: Jul-Aug 2013: n=152; Sep-Dec 2013: n=115; 2014: n=359; 2015: n=317; 2016: n=272; 2017: n=340; 2018: n=228.*

*The Limit of Quantification (LOQ) was 10 ng/L until September 2017; thereafter it was reduced at 5 ng/L. Samples with a value <LOQ were assigned a value equal to half the LOQ.*

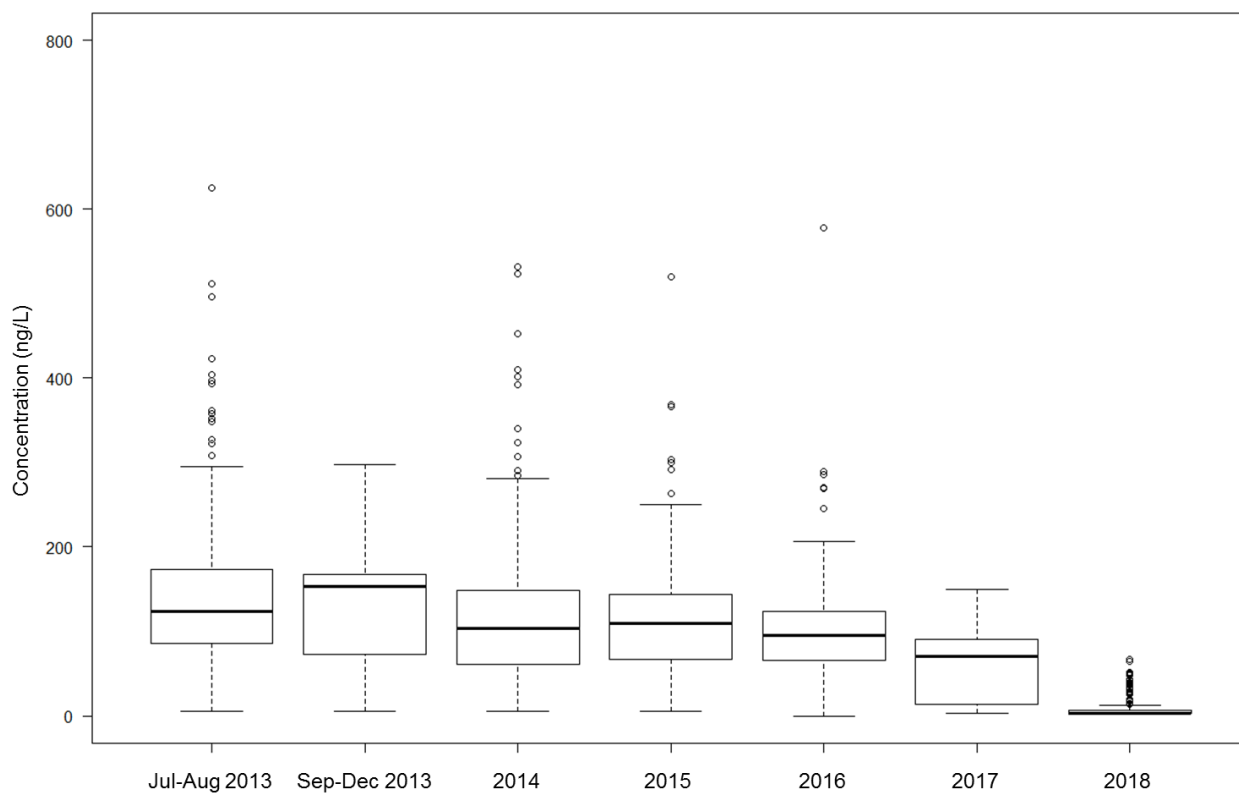

**Figure S3 - Concentrations of PFBA in drinking water from waterworks of the Red Area, by time period.**

*PFBA, perfluorobutanoic acid.*

*Number of samples: Jul-Aug 2013: n=152; Sep-Dec 2013: n=115; 2014: n=359; 2015: n=317; 2016: n=272; 2017: n=340; 2018: n=228.*

*The Limit of Quantification (LOQ) was 10 ng/L until September 2017; thereafter it was reduced at 5 ng/L. Samples with a value <LOQ were assigned a value equal to half the LOQ.*

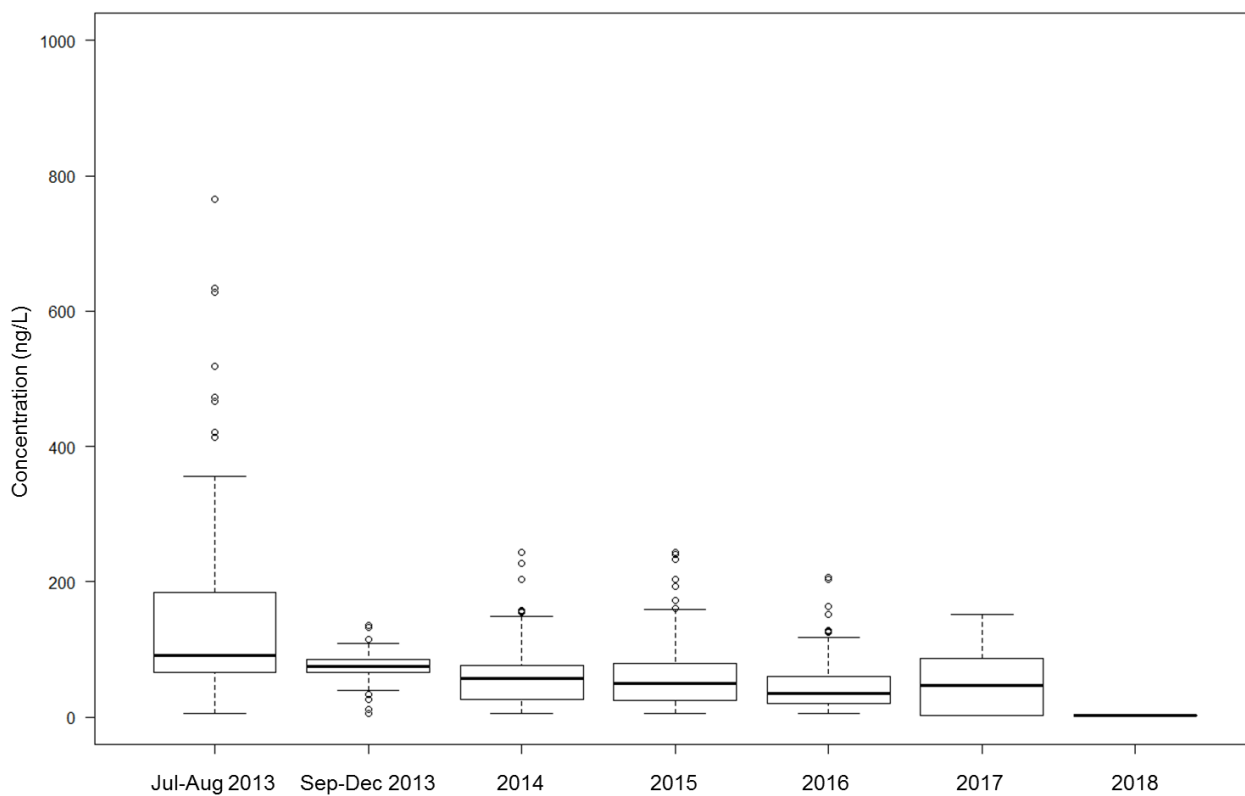

**Figure S4 - Concentrations of PFBS in drinking water from waterworks of the Red Area, by time period.**

*PFBS, perfluorobutanesulfonic acid.*

*Number of samples: Jul-Aug 2013: n=152; Sep-Dec 2013: n=115; 2014: n=359; 2015: n=317; 2016: n=272; 2017: n=340; 2018: n=228.*

*The Limit of Quantification (LOQ) was 10 ng/L until September 2017; thereafter it was reduced at 5 ng/L. Samples with a value <LOQ were assigned a value equal to half the LOQ.*

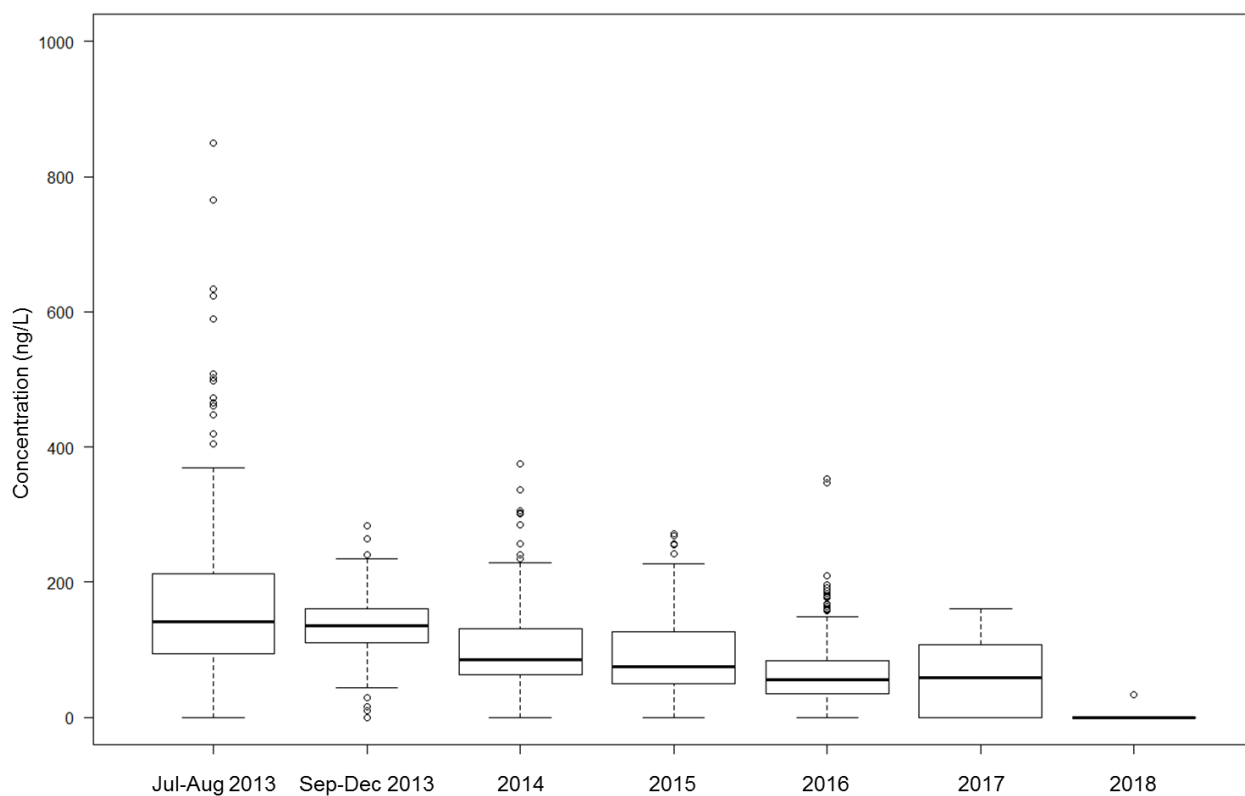

**Figure S5 - Sum of the concentrations of other PFAS in drinking water from waterworks of the Red Area, by time period.**

*Other PFAS: PFPeA (perfluoropentanoic acid), PFHxA (perfluorohexanoic acid), PFHpA (perfluoroheptanoic acid), PFNA (perfluorononanoic acid), PFDeA (perfluorodecanoic acid), PFUnA (perfluoroundecanoic acid), PFDoA (perfluorododecanoic acid), PFHxS (perfluorohexanesulfonic acid).*

*Number of samples: Jul-Aug 2013: n=152; Sep-Dec 2013: n=115; 2014: n=359; 2015: n=317; 2016: n=272; 2017: n=340; 2018: n=228.*

*The Limit of Quantification (LOQ) for each compound was 10 ng/L until September 2017; thereafter it was reduced at 5 ng/L. Samples with a value <LOQ were assigned a value equal to half the LOQ.*
